1 **Tomato brassinosteroid-signaling kinase Bsk830 is a component of flagellin**  
2 **signaling that regulates pre-invasion immunity**

3

4 Guy Sobol<sup>1</sup>, Bharat Bhusan Majhi<sup>1,4</sup>, Metsada Pasmanik-Chor<sup>2</sup>, Ning Zhang<sup>3</sup>, Holly  
5 M. Roberts<sup>3</sup>, Gregory B. Martin<sup>3</sup>, and Guido Sessa<sup>1\*</sup>

6

7 <sup>1</sup>School of Plant Sciences and Food Security, Tel-Aviv University, 69978 Tel-Aviv,  
8 Israel

9 <sup>2</sup>Bioinformatics Unit, G.S. Wise Faculty of Life Science, Tel-Aviv University, 69978,  
10 Tel- Aviv, Israel

11 <sup>3</sup>Boyce Thompson Institute for Plant Research and Plant Pathology and Plant-  
12 Microbe Biology Section, School of Integrative Plant Science, Cornell University,  
13 Ithaca, New York 14853, USA

14

15 \***Correspondence:** Guido Sessa, School of Plant Sciences and Food Security, Tel-  
16 Aviv University, 69978 Tel-Aviv, Israel. Email: [guidos@tauex.tau.ac.il](mailto:guidos@tauex.tau.ac.il)

17

18 <sup>4</sup>**Present Address:** Department of Chemistry, Biochemistry and Physics, Université  
19 du Québec à Trois-Rivières, Trois-Rivières, Quebec G9A 5H7, Canada

20

21 **Running Title:** The role of tomato Bsk830 in flagellin signaling

22 **ABSTRACT**

23 Detection of bacterial flagellin by the tomato receptors Flagellin sensing 2 (Fls2) and  
24 Fls3 triggers activation of pattern-triggered immunity (PTI). Tomato signaling  
25 components associated or downstream of flagellin receptors are largely unknown.  
26 We investigated the involvement of tomato brassinosteroid-signaling kinase 830  
27 (Bsk830) in PTI triggered by flagellin perception. Bsk830 localized to the plasma  
28 membrane and interacted with Fls2 and Fls3. Consistent with a role in flagellin-  
29 induced signaling, CRISPR/Cas9-generated tomato *bsk830* mutants were impaired  
30 in ROS accumulation induced by the flagellin-derived flg22 and flgII-28 peptides. In  
31 addition, *bsk830* mutants developed larger populations of *Pseudomonas syringae*  
32 pv. *tomato* (*Pst*) strain DC3000 than wild-type plants, whereas no differences were  
33 observed in plants infected with the flagellin deficient *Pst* DC3000 $\Delta$ *fliC*. *bsk830*  
34 mutants failed to close stomata when infected with *Pst* DC3000 and *Pseudomonas*  
35 *fluorescens*, and were more susceptible to *Pst* DC3000 than wild-type plants when  
36 inoculated by dipping, but not by vacuum-infiltration, indicating involvement of  
37 Bsk830 in pre-invasion immunity. Analysis of gene expression profiles in *bsk830*  
38 mutants detected a reduced number of differentially expressed genes and altered  
39 expression of jasmonic acid (JA)-related genes. In support of deregulation of JA  
40 response in *bsk830* mutants, these plants were similarly susceptible to *Pst* DC3000  
41 and to the *Pst* DC3118 strain, which is deficient in coronatine production, and more  
42 resistant to the necrotrophic fungus *Botrytis cinerea* following PTI activation. These  
43 results indicate that tomato Bsk830 is required for a subset of flagellin-triggered PTI  
44 responses and support a model in which Bsk830 negatively regulates JA signaling  
45 during PTI activation.

## 46 INTRODUCTION

47 Plants have evolved a complex immune system to confront the wide range of  
48 pathogens which inhabit their natural environment. Plant immune responses are  
49 activated through recognition of highly conserved microbe-associated molecular  
50 patterns (MAMPs) by membrane-localized pattern recognition receptors (PRRs)  
51 (DeFalco and Zipfel, 2021), or by detection of pathogen effectors by intracellular  
52 nucleotide binding leucine-rich repeat receptors (NLR) (Duxbury et al., 2021). In  
53 tomato (*Solanum lycopersicum*), known PRRs include Fls2 (Robatzek et al., 2007)  
54 and Fls3 (Hind et al., 2016), which perceive the bacterial flagellin-derived peptides  
55 flg22 and flgII-28, respectively, and CORE, which detects the bacterial cold shock  
56 protein-derived peptide csp22 (Wang et al., 2016). Flg22 and flgII-28 represent major  
57 bacterial MAMPs recognized by tomato (Rosli et al., 2013), and their binding by Fls2  
58 and Fls3 activates signaling pathways that regulate molecular events promoting  
59 defense, collectively referred to as pattern-triggered immunity (PTI) (Liang and Zhou,  
60 2018). PTI responses include production of reactive oxygen species (ROS),  
61 activation of mitogen-activated protein kinases (MAPKs), transcriptional  
62 reprogramming, callose deposition at the cell wall, stomatal closure and activation of  
63 hormone signaling (DeFalco and Zipfel, 2021).

64 Stomata closure is a MAMP-triggered and PRR-mediated defense response,  
65 also referred to as stomatal immunity, particularly important against leaf-associated  
66 pathogenic bacteria, which gain access to the plant apoplast through these natural  
67 openings as well as wounds (Melotto et al., 2017). Dynamics of stomatal immunity  
68 against phytopathogenic bacteria have been described for the interaction of  
69 *Arabidopsis* and tomato plants with *Pseudomonas syringae* pv. *tomato* (*Pst*) bacteria  
70 (Melotto et al., 2006; Du et al., 2014). Plant infection with *Pst* DC3000 causes

71 stomata closure within 1 h post-inoculation followed by stomata reopening 3-4 h  
72 later. Stomatal movement is modulated by ROS accumulation that controls the  
73 activity of ion pumps, plasma membrane channels, and transporters (Sierla et al.,  
74 2016). In Arabidopsis ROS molecules have been shown to be generated by the  
75 NADPH oxidase RBOHD that is activated by phosphorylation upon MAMPs  
76 perception by PRRs (Wang and Gou, 2021). MAMP perception also triggers the  
77 activation of signaling pathways involving the hormones salicylic acid (SA) and  
78 abscisic acid (ABA), which contribute to stomatal closure. Plants defective in SA and  
79 ABA synthesis and signaling are unable to induce stomatal closure (Melotto et al.,  
80 2017). SA and ABA pathways have been shown to contribute to stomata closure  
81 independently and in an interconnected manner (Arnaud and Hwang, 2015).

82 Stomatal reopening is induced by the pathogen to gain entry into leaves. To  
83 promote stomatal reopening, *Pseudomonas syringae* bacteria take advantage of the  
84 antagonistic interplay between the plant hormones SA and jasmonic acid (JA)  
85 (Thaler et al., 2012). *P. syringae* secretes type III effectors and phytotoxins to  
86 enhance JA signaling and repress SA signaling. For example, the HopX1 and  
87 HopZ1a effectors induce degradation of JAZ proteins, which are negative regulators  
88 of JA signaling, to enhance JA signaling and stomata reopening (Jiang et al., 2013;  
89 Gimenez-Ibanez et al., 2014). The *P. syringae* coronatine (COR) phytotoxin is a JA-  
90 Ile-mimic molecule that binds the JA receptor COI1 and activates JA-mediated  
91 processes (Katsir et al., 2008). Binding of COR to COI1 triggers downstream  
92 signaling that induces NAC transcription factors which inhibit SA accumulation and  
93 promote stomata reopening (Melotto et al., 2017).

94 PRRs recruit receptor-like cytoplasmic kinases (RLCKs) to link MAMP  
95 perception to downstream signaling. Multiple Arabidopsis RLCKs play a role in plant

96 immunity. For example, BOTRYTIS-INDUCED KINASE1 (BIK1), a member of the  
97 RLCK subfamily VII, associates with multiple PRRs and activates downstream  
98 signaling components such as the NADPH oxidase RBOHD (Kadota et al., 2014; Li  
99 et al., 2014) and several calcium channels (Tian et al., 2019; Thor et al., 2020).  
100 Similar to BIK1, additional members of the RLCK subfamily VII contribute to PTI  
101 (Rao et al., 2018). RLCKs regulate stomatal immunity and are essential for the initial  
102 closure step (Wang and Gou, 2021). For example, BIK1 and PBL27 regulate  
103 stomatal closure by promoting activation of ion channels (Zheng et al., 2018; Liu et  
104 al., 2019; Thor et al., 2020).

105       Brassinosteroid-signaling kinases (BSKs) belong to the RLCK subfamily XII and  
106 several of them were extensively characterized in Arabidopsis and shown to play a  
107 role in brassinosteroid signaling, growth, and response to abiotic stress (Tang et al.,  
108 2008; Li et al., 2012b; Sreeramulu et al., 2013; Jia et al., 2019; Ren et al., 2019).  
109 Recent investigation identified Arabidopsis BSKs that are involved in plant immunity  
110 (Shi et al., 2013; Majhi et al., 2019 and 2021). BSKs participate in various branches  
111 of defense signaling, as evident by their interaction with multiple PRRs, and  
112 mediation of different PTI responses. For example, BSK1, BSK5, BSK7, and BSK8  
113 associate with the PRR FLS2 and mutations in the corresponding genes  
114 compromise a subset of flg22-mediated PTI responses (Shi et al., 2013; Majhi et al.,  
115 2019 and 2021). BSK1 was also found to modulate MAPK activation by  
116 phosphorylation of the MAPKKK MAPKKK5 and the MAPK MPK15 (Yan et al., 2018;  
117 Shi et al., 2022). In addition, while BSK1, BSK7, and BSK8 interact exclusively with  
118 FLS2, BSK5 also interacts with EFR and PEPR1 and is required for their signaling  
119 (Majhi et al., 2019). In line with a function of BSKs in immune signaling, *bsk1*, *bsk5*,  
120 *bsk7* and *bsk8* mutants display enhanced susceptibility to fungal and bacterial

121 pathogens (Shi et al., 2013; Majhi et al., 2019 and 2021). Another family member,  
122 BSK3, was shown to interact *in vivo* with multiple components of immune signaling  
123 (Xu et al., 2014), but its function in plant immunity is yet unknown.

124 Tomato BSKs are less characterized, but at least two of the seven family  
125 members play a role in plant immunity (Singh et al., 2014; Roberts et al., 2019a). A  
126 tomato homolog of BSK7 was found to interact with *Pst* DC3000 effectors and  
127 silencing of its homologous genes compromised PTI in *Nicotiana benthamiana*  
128 (Singh et al., 2014). Tomato Mai1, homolog of Arabidopsis BSK1, interacts with  
129 MAPKKK $\alpha$ , a signaling component required for NLR-mediated immunity (Roberts et  
130 al., 2019a). Silencing of Mai1 *N. benthamiana* homologs enhanced susceptibility to  
131 *Pst* DC3000 and compromised the hypersensitive response mediated by several *R*  
132 genes (Roberts et al., 2019a). Here, we investigated the involvement of tomato  
133 BSKs in plant immunity. We provide evidence that Bsk830 physically interacts with  
134 flagellin receptors and localizes to the cell plasma membrane. Analysis of two  
135 independent loss-of-function mutant lines revealed that Bsk830 is required for  
136 stomatal immunity against *Pst* DC3000 and for flagellin-induced ROS production.  
137 Analysis of gene expression profiles indicated that loss of *Bsk830* caused an  
138 attenuated PTI response and deregulation of JA signaling. Consistent with an altered  
139 JA response, loss of *Bsk830* compromised the contribution of the COR toxin to *Pst*  
140 DC3000 virulence and reduced susceptibility to a fungal necrotrophic pathogen.  
141 Together, our results indicate that Bsk830 modulates a subset of flagellin-induced  
142 PTI responses and contributes to regulation of JA signaling during PTI.

## 143 **RESULTS**

### 144 **Tomato Bsk830 interacts with the flagellin receptors Fls2 or Fls3**

145 Recognition of the motility-associated protein flagellin plays a major role in the  
146 induction of PTI responses on some tomato accessions (Roberts et al., 2019b).  
147 Flagellin contains two MAMPs, flg22 and flgII-28, that are recognized by the PRRs  
148 Flagellin sensing 2 (Fls2) and Fls3, respectively (Gómez-Gómez and Boller, 2000;  
149 Robatzek et al., 2007; Hind et al., 2016). To investigate the possible involvement of  
150 brassinosteroid-signaling kinase (Bsk) proteins in tomato PTI initiated by flagellin  
151 perception, we tested interactions of tomato Bsk family members with Fls2 and Fls3  
152 in a yeast two-hybrid system by using Bsk proteins as baits and the kinase domain of  
153 Fls2 (Fls2<sub>KD</sub>) and Fls3 (Fls3<sub>KD</sub>) as preys. Bsk830, but none of the other six tomato  
154 Bsk family members, interacted with both PRRs (Figure 1A). Next, a split luciferase  
155 complementation assay was employed to validate in planta interactions observed in  
156 yeast. In these experiments, Fls2<sub>KD</sub> and Fls3<sub>KD</sub> were fused to the C-terminal half of  
157 the luciferase protein (C-LUC) and co-expressed via *Agrobacterium tumefaciens* in  
158 *N. benthamiana* leaves with Bsk830 fused to the N-terminal half of luciferase (N-  
159 LUC). As negative controls, C-LUC-PRRs and N-LUC-Bsk830 were co-expressed  
160 with N-LUC and C-LUC empty vectors, respectively. Interactions were quantified by  
161 measurement of luminescence emitted from leaf discs sampled at 48 h after agro-  
162 infiltration. Co-expression of Bsk830 with Fls2<sub>KD</sub> or Fls3<sub>KD</sub> resulted in significantly  
163 higher luminescence than the negative controls (Figure 1B). Expression in yeast and  
164 in planta of all fusion proteins was confirmed by Western blot analysis (Supplemental  
165 Figure S1, A and B and Roberts et al., 2019a).

166 To assess the hypothesis that Bsk830 participates in phosphorylation  
167 cascade(s) initiated by Fls2 and Fls3, we tested whether Bsk830 is a substrate of

168 Fls2 or Fls3 phosphorylation in an *in vitro* kinase assay. Bsk830 and the cytoplasmic  
169 domains of Fls2 (Fls2<sub>CD</sub>) and Fls3 (Fls3<sub>CD</sub>) were fused to the C-terminus of the  
170 maltose binding protein (MBP), expressed in *E. coli*, and affinity-purified. MBP-Fls2<sub>CD</sub>  
171 and MBP-Fls3<sub>CD</sub> were incubated with the MBP-Bsk830 fusion in the presence of [ $\gamma$ -  
172 <sup>32</sup>P]ATP in an *in vitro* kinase assay. As previously reported (Roberts et al., 2020),  
173 MBP-Fls2<sub>CD</sub> and MBP-Fls3<sub>CD</sub> displayed autophosphorylation activity (Supplemental  
174 Figure S2). However, phosphorylation of MBP-Bsk830 by MBP-Fls2<sub>CD</sub> or MBP-  
175 Fls3<sub>CD</sub> was not detected (Supplemental Figure S2), indicating that Bsk830 is not a  
176 substrate of Fls2 and Fls3 kinase activity *in vitro* despite its interaction with both  
177 PRRs.

178

#### 179 **Lipid modifications anchor Bsk830 to the plasma membrane**

180 The Fls2 and Fls3 PRRs are receptor kinases localized to the plasma membrane  
181 (PM) (Andolfo et al., 2013; Hind et al., 2016). Based on the interaction of Bsk830  
182 with Fls2 and Fls3, and the presence of putative myristoylation and palmitoylation  
183 sites at the Bsk830 N-terminus (Figure 2A), we hypothesized that Bsk830 is  
184 anchored to the PM by fatty acids modifications. To examine this possibility, Bsk830  
185 was fused to the N-terminus of YFP and transiently expressed via *A. tumefaciens* in  
186 *N. benthamiana* leaves along with the PM marker Flot1b-mCherry (Li et al., 2012a).  
187 Bsk830-YFP displayed a similar distribution as Flot1b-mCherry (Figure 2B, upper  
188 panels) that was confirmed by quantifying fluorescence detected in the YFP and  
189 mCherry channels along a set path (Figure 2B, lower panels). In contrast to Bsk830-  
190 YFP, the Bsk830<sup>G2A</sup>-YFP and Bsk830<sup>C(3,11,12)A</sup>-YFP variants, which carry mutations in  
191 putative myristoylation and palmitoylation sites, respectively, did not co-localize with



192 Flot1b-mCherry (Figure 2C). These observations suggest that Bsk830 is associated  
193 to the PM through myristoylation and palmitoylation modifications.

194

### 195 **Mutations in the *Bsk830* gene compromise flagellin-mediated immunity**

196 To investigate the function of Bsk830 in plant immunity, we used CRISPR/Cas9  
197 technology to generate tomato plants with mutations in the *Bsk830* gene. Two  
198 independent mutant lines, *bsk830-1* and *bsk830-2*, were generated and allowed to  
199 segregate until homozygous genotypes were obtained in the T2 generation.  
200 Sequence analysis of the area flanking the gRNA-targeted sequence revealed  
201 deletions of 4 bp and 135 bp in the first exon of *Bsk830* in *bsk830-1* and *bsk830-2*,  
202 respectively (Supplemental Figure S3). Next, we tested the involvement of Bsk830 in  
203 flagellin-induced immunity by examining susceptibility of wild-type and *bsk830*  
204 mutant lines to the bacterial pathogen *Pst* DC3000 and its derivative mutant strain  
205 *Pst* DC3000 $\Delta$ *fliC*, which does not form flagella (Kvitko et al., 2009). Plants were  
206 inoculated by dipping into suspensions ( $1 \times 10^7$  CFU/mL) of *Pst* DC3000 and *Pst*  
207 DC3000 $\Delta$ *fliC*, and bacterial populations were determined in leaf tissue at 2 days  
208 post-inoculation (dpi). *Pst* DC3000 bacteria displayed a significantly higher growth in  
209 *bsk830* mutant lines than in wild-type plants suggesting that Bsk830 is involved in  
210 immunity (Figure 3A). In addition, growth of *Pst* DC3000 $\Delta$ *fliC* was higher than *Pst*  
211 DC3000 in wild-type plants, likely because *Pst* DC3000 $\Delta$ *fliC*, lacking flagellin, is not  
212 detected by Fls2 or Fls3. Conversely, growth of *Pst* DC3000 and *Pst* DC3000 $\Delta$ *fliC*  
213 was similar in the *bsk830* mutants, suggesting that in these plants flagellin-induced  
214 immunity is impaired. In line with this conclusion, similar bacterial populations were  
215 observed in wild-type plants infected with *Pst* DC3000 $\Delta$ *fliC* and in *bsk830* mutants  
216 infected with *Pst* DC3000 indicating that flagellin-mediated immunity was not

217 activated in these interactions: in the first instance because the bacteria did not  
218 express flagellin, and in the second instance because the plant was impaired in  
219 flagellin signaling.

220 To confirm that *bsk830* mutant plants are impaired in flagellin-induced immunity,  
221 we examined PTI responses triggered in these plants by the flg22 and flgII-28  
222 MAMPs. Wild-type and mutant plants were treated with flg22 or flgII-28 and  
223 monitored for ROS production and MAPK phosphorylation. The *fls2.1/fls2.2* and *fls3*  
224 mutants, which are not responsive to flg22 and flgII-28, respectively (Roberts et al.,  
225 2020), were used as negative controls. On treatment with flg22 and flgII-28, *bsk830*  
226 mutants accumulated lower levels of ROS than wild-type plants (Figure 3, B and C),  
227 while MAPK phosphorylation was similarly activated in both genetic backgrounds  
228 (Supplemental Figure S4, A and B). As expected, *fls2.1/fls2.2* and *fls3* mutants did  
229 not produce ROS (Figure 3, B and C), and were impaired in the activation of MAPK  
230 phosphorylation (Supplemental Figure S4, A and B). Together, these results indicate  
231 that Bsk830 is required for a subset of flagellin-induced PTI responses.

232

### 233 ***Bsk830* mutant plants are impaired in stomatal immunity**

234 In experiments that revealed enhanced susceptibility of *bsk830* mutants to *Pst*  
235 DC3000 infection, plant inoculation was carried out by dipping plants into bacterial  
236 suspensions. The use of this inoculation technique left unresolved whether Bsk830 is  
237 required for immune responses that counteract the pathogen on the leaf surface  
238 during the pre-invasion phase of infection or in the leaf apoplast during the post-  
239 invasion phase of infection. To differentiate between these possibilities, wild-type  
240 plants and *bsk830* mutants were inoculated with a *Pst* DC3000 suspension by  
241 vacuum-infiltration ( $1 \times 10^5$  CFU/mL), which delivers bacteria directly into the apoplast,

242 or by dipping ( $1 \times 10^7$  CFU/mL), which requires movement of bacteria through stomata  
243 for infection. Bacterial populations were determined in leaf tissues sampled at 0 and  
244 2 dpi. *Pst* DC3000 bacteria displayed a significantly higher growth in *bsk830* mutants  
245 than in wild-type plants inoculated by dipping (Figure 4A). However, similar bacterial  
246 populations were observed in wild-type and mutants plants inoculated by vacuum-  
247 infiltration (Figure 4B), suggesting a role for Bsk830 in pre-invasion immunity. A  
248 similar stomatal number index was observed for wild-type and *bsk830* mutant plants  
249 (Supplemental Figure S5), excluding a bias due to developmental differences  
250 between genetic backgrounds used in these experiments.

251 Because pre-invasion immunity relies on stomatal closure to prevent entrance  
252 of bacteria into the leaf apoplast (Melotto et al., 2017), we examined dynamics of  
253 stomatal opening/closure in *bsk830* mutants upon infection with *Pst* DC3000  
254 pathogenic bacteria and *Pseudomonas fluorescens* (*Pf*) A506 non-pathogenic  
255 bacteria. Both types of bacteria are known to induce stomatal closure early after  
256 infection, but only pathogenic bacteria overcome this line of defense at later stages  
257 of infection by using virulence factors to reopen stomata (Melotto et al., 2017). Prior  
258 to bacterial challenge, leaf pieces of wild-type and *bsk830* mutant plants were floated  
259 on stomatal opening buffer under light to ensure stomata opening. After 3 h, leaf  
260 pieces were transferred to *Pst* DC3000 or *Pf* bacterial suspension ( $1 \times 10^8$  CFU/mL),  
261 or kept on buffer (mock), and monitored for stomatal apertures during the following 4  
262 h. At 0 h, stomata of both plant genotypes were similarly open, suggesting that loss  
263 of function in *Bsk830* does not interfere with light-induced stomatal opening (Figure  
264 4, C and D). On *Pst* DC3000 treatment, stomata of wild-type plants closed at 1 h  
265 after infection and reopened at 2.5 h (Figure 4C), while on *Pf* treatment, they closed  
266 at 2.5 h and remained closed at 4 h (Figure 4D). In contrast, on both treatments,

267 stomata of the *bsk830* mutant plants remained open for the entire course of the  
268 experiment similar to mock-treated plants (Figure 4, C and D). These results indicate  
269 that Bsk830 is required for stomatal closure associated with pre-invasion immunity.

270

271 **Loss of function in *Bsk830* alters expression of JA- and phenylpropanoid-**  
272 **related genes during PTI**

273 To uncover molecular mechanisms underlying the contribution of Bsk830 to tomato  
274 immunity, we compared expression profiles of wild-type and *bsk830* mutant plants  
275 during the onset of PTI. Leaves of wild-type and *bsk830-1* lines were inoculated by  
276 vacuum-infiltration with a suspension ( $1 \times 10^8$  CFU/mL) of *Pf* bacteria or a mock  
277 solution; samples were collected at 0 and 6 h post-inoculation, and subjected to  
278 RNA-seq analysis. In these experiments, we opted for induction of PTI by non-  
279 pathogenic rather than by pathogenic bacteria to avoid possible interference of  
280 virulence factors. In addition, plants were inoculated by vacuum-infiltration, rather  
281 than by dipping, to assure an equal bacterial load in the inoculated leaves despite  
282 the defective dynamics of stomatal closure of *bsk830* mutants. A total of 2,146 (852  
283 up-regulated; 1,294 down-regulated) and 1,325 (655 up-regulated; 665 down-  
284 regulated) differentially expressed genes (DEGs) were identified in *Pf*-inoculated  
285 wild-type and *bsk830* mutant plants, respectively, as compared to mock inoculated  
286 plants with filtering parameters of pFDR < 0.05 and a fold change >3 (Figure 5A;  
287 Supplemental Table S1). 1,207 DEGs were common to both genotypes, whereas  
288 939 and 118 were unique to wild-type and *bsk830* mutant plants, respectively  
289 (Figure 5A). These results suggest that *bsk830* mutants were less responsive to *Pf*  
290 inoculation than wild-type plants.

291 To identify cellular processes in which Bsk830 is involved, we examined functional  
292 categories over-represented among genes that were expressed in wild-type plants,  
293 but not in the *bsk830* mutant or vice versa, and genes whose fold-change during PTI  
294 differed by at least  $\pm 20\%$  between the *bsk830* mutant and the wild-type. Arabidopsis  
295 homologs of genes from this pool were subjected to functional enrichment analysis  
296 by using the g:Profiler tool (Raudvere et al., 2019) as separate entries based on their  
297 up- or down-regulation during PTI. The use of Arabidopsis homologs allowed a more  
298 extensive characterization of the gene pool in comparison to the use of tomato gene  
299 accessions. Among genes up-regulated during PTI, the predominant functional  
300 categories enriched in the *bsk830* mutant were related to JA signaling and response,  
301 and to metabolism of phenylpropanoids (Table 1). In *bsk830* mutant, expression of  
302 genes involved in JA biosynthesis (e.g., AOS, LOX3, OPR2; Wasternack and Song,  
303 2016), catabolism (e.g., JAO2, JAO3, CYP94B1; Smirnova et al., 2017), and  
304 negative regulation of JA signaling (e.g., JAZ2, JAZ3, JAZ7, JAZ9, JAM2; Sasaki-  
305 Sekimoto et al., 2013) was reduced as compared to wild-type plants (Figure 5B,  
306 Supplemental Table S1). In addition, the transcript abundance of genes encoding  
307 various JA response factors (e.g., NATA1, TD, PI-I, ERF1, ERF5, JA2L; Du et al.,  
308 2017) was reduced or increased (Figure 5B, Supplemental Table S1). Genes related  
309 to phenylpropanoid metabolism displayed increased expression in the *bsk830*  
310 mutant and included homologs of phenylalanine ammonia-lyase (PAL) as well as  
311 enzymes acting downstream to PALs and involved in lignin biosynthesis (Vanholme  
312 et al., 2019) (Supplemental Table S1). Among genes down-regulated during PTI, the  
313 predominant categories enriched in the *bsk830* mutant were mainly related to  
314 photosynthesis (Table 1). Expression of photosynthesis-related genes was more  
315 elevated in the *bsk830* mutant than in wild-type plants (Supplemental Table S1),

316 suggesting a less extensive reallocation of resources from general metabolism to  
317 defense that is usually observed in plants activating immune responses (Attaran et  
318 al., 2014). Together, these results suggest that loss of *Bsk830* results in a weaker  
319 PTI response and altered regulation of JA signaling and response.

320

### 321 **Mutation of *Bsk830* affects JA-mediated phenotypes**

322 To assess the hypothesis that loss of *Bsk830* causes altered regulation of the JA  
323 response during the onset of PTI, we examined the contribution of the COR toxin to  
324 *Pst* DC3000 virulence in wild-type and *bsk830* mutant plants. COR is a hormone  
325 mimic, which closely resembles JA-Ile (Katsir et al., 2008), and it has been shown to  
326 activate JA signaling and promote stomatal opening (Melotto et al., 2017). Leaves of  
327 wild-type, *bsk830-1* and *bsk830-2* lines were inoculated by dipping in bacterial  
328 suspensions ( $1 \times 10^7$  CFU/mL) of *Pst* DC3000 (able to synthesize COR; COR+) or *Pst*  
329 DC3118 (unable to synthesize COR; COR-), and bacterial populations were  
330 determined in leaves at 0 and 2 dpi. In wild-type plants, *Pst* DC3000 (COR+)  
331 bacteria displayed a significantly higher growth than *Pst* DC3118 (COR-) (Figure 6A)  
332 indicating that COR promotes bacterial virulence, as previously reported (Zheng et  
333 al., 2012; Du et al., 2014; Gimenez-Ibanez et al., 2017). Conversely, in *bsk830*  
334 mutant plants, *Pst* DC3000 (COR+) and *Pst* DC3118 (COR-) displayed a similar  
335 growth indicating that mutation of *Bsk830* compromises the contribution of COR to  
336 bacterial virulence and suggesting that, similar to COR, a mutation in *Bsk830*  
337 deregulates the JA response.

338 Next, we examined the effect of loss of function in *Bsk830* on susceptibility to  
339 the necrotrophic fungal pathogen *Botrytis cinerea*, which is known to be mediated by  
340 JA (Zhang et al., 2017). Wild-type and *bsk830* mutant plants were pretreated with a

341 mock solution or with a *Pf* bacterial suspension ( $1 \times 10^8$  CFU/mL) to activate PTI, and  
342 24 h later plants were infected by placing on the leaves a droplet of a *B. cinerea*  
343 spore suspension ( $2 \times 10^5$  conidia mL<sup>-1</sup>). Lesion diameter in infected leaves was  
344 measured at 3 dpi (Figure 6B). Wild-type and *bsk830* mutant plants were equally  
345 susceptible to *B. cinerea* when mock treated. However, following the *Pf* treatment,  
346 symptoms developed more slowly and lesions were significantly smaller in leaves of  
347 *bsk830* mutant plants than in wild-type plants. These results support a model in  
348 which the JA response is deregulated during the onset of PTI in *bsk830* mutant  
349 plants.

## 350 **DISCUSSION**

351 We identified the tomato RLCK Bsk830 as a component of signaling pathways  
352 originated from perception of bacterial flagellin by the Fls2 and Fls3 PRRs. Initial  
353 indication for the involvement of Bsk830 in plant immunity was its interaction with the  
354 flagellin receptors Fls2 and Fls3 that was observed in yeast and then validated in  
355 planta. Subsequent analysis of *bsk830* mutant plants revealed that Bsk830 is  
356 required for pre-invasion immunity by mediating a subset of PTI responses including  
357 ROS accumulation and stomatal closure possibly through negative regulation of JA  
358 signaling. BSK family members appear to play a role in flagellin-induced signaling in  
359 different plant species: in tomato, Bsk830 (but not other Bsk family members) is  
360 recruited by two flagellin receptors and is required for flagellin-induced immunity,  
361 while in Arabidopsis multiple BSKs (BSK1, BSK5, BSK7, BSK8) interact with the  
362 FLS2 PRR and play a role in flg22-induced PTI (Shi et al., 2013; Majhi et al., 2019  
363 and 2021). It remains to be determined whether Bsk830 participates only in signaling  
364 pathways activated by flagellin-derived MAMPs, similar to its closest Arabidopsis  
365 homologs BSK7 and BSK8 (required for PTI responses triggered by flg22, but not by  
366 elf18 and pep1 [Majhi et al., 2021]), or if it is involved in signaling events activated by  
367 multiple MAMPs, as observed for Arabidopsis BSK5 (Majhi et al., 2019).

368 Similar to other BSK family members (Majhi et al., 2019 and 2021; Ren et al.,  
369 2019; Roberts et al., 2019a; Su et al., 2021), Bsk830 localizes to the plasma  
370 membrane, where it may interact with PRRs and associated components of immune  
371 complexes. N-terminal sites predicted to mediate myristoylation and palmitoylation  
372 modifications were essential to its plasma membrane localization, common  
373 mechanisms used by BSKs for plasma membrane anchoring (Majhi et al., 2019 and  
374 2021; Ren et al., 2019; Roberts et al., 2019a; Su et al., 2022) or maintenance of



375 protein stability, as demonstrated for BSK1 (Su et al., 2022). However, the output of  
376 the interaction of Bsk830 with Fls2 and Fls3 is yet unknown. It is unlikely that Bsk830  
377 is activated by Fls2 and/or Fls3 phosphorylation, because Fls2 and Fls3 were not  
378 able to phosphorylate Bsk830 *in vitro* despite detection of their autophosphorylation  
379 activity. It is possible that additional molecules, which participate *in vivo* in Bsk830  
380 phosphorylation by Fls2 and Fls3, are missing *in vitro*. Alternatively, Bsk830 might  
381 function as a scaffolding protein that mediates signal transduction by bringing  
382 signaling components in proximity, as it has been suggested for other BSKs  
383 (Sreeramulu et al., 2013; Ren et al., 2019; Majhi et al., 2019 and 2021). The latter  
384 hypothesis is supported by the evidence that Bsk830 autophosphorylation was not  
385 detected under the conditions used in our *in vitro* experiments.

386 Phenotypic analysis of *bsk830* mutant lines revealed that Bsk830 is required for a  
387 subset of PTI responses induced by flagellin-derived MAMPs, including ROS  
388 production, but not MAPK phosphorylation. This result, together with previous  
389 observations that Arabidopsis *bsk1*, *bsk5*, *bsk7* and *bsk8* mutant lines are impaired  
390 in flg22-induced ROS production (Shi et al., 2013; Majhi et al., 2019 and 2021),  
391 confirms a central role of BSK family members in signaling pathway(s) that link flg22  
392 sensing to ROS accumulation. Conversely, it is less likely that BSK family members  
393 are involved in signaling of flg22-induced MAP kinase activation. In our experiments,  
394 a mutation in *Bsk830* did not alter MAP kinase activation induced by flg22 treatment  
395 in tomato plants. Similarly, Arabidopsis lines carrying different combinations of  
396 mutations in *BSK* genes, including up to seven *BSKs*, displayed a similar MAPK  
397 activation as wild-type plants following flg22 challenge (Majhi et al., 2021). However,  
398 it is still possible that BSKs participate in MAP kinase activation induced by other  
399 MAMPs or pathogen effectors. In support of this hypothesis, BSK1 was shown to

400 phosphorylate *in vitro* MAPKKK5 and MPK15, and required for disease resistance  
401 mediated by these MAPKKKs against virulent and avirulent *Pst* DC3000 strains and  
402 powdery mildew fungi, respectively (Yan et al., 2018; Shi et al., 2022).

403 We provide evidence that Bsk830 is involved in pre-invasion immunity, as *bsk830*  
404 mutants failed to close stomata when inoculated with pathogenic and non-  
405 pathogenic bacterial strains, and displayed enhanced susceptibility to *Pst* DC3000  
406 when inoculated by dipping, but not by vacuum-infiltration. Stomata closure is a PTI  
407 response that prevents bacteria from entering the plant apoplast and is activated by  
408 detection of MAMPs by PRRs (Melotto et al., 2017). For example, Arabidopsis plants  
409 mutated in FLS2 or in both PEPR1 and PEPR2 PRRs fail to close stomata when  
410 challenged with the respective MAMPs, and are more susceptible to *Pst* DC3000  
411 when dip-inoculated, but not when syringe-infiltrated (Zipfel et al., 2004; Melotto et  
412 al., 2006; Zheng et al., 2018). In Arabidopsis, the RLCKs BIK1 and PBL27 act  
413 downstream of PRRs in signaling pathways that lead to stomata closure (Wang and  
414 Gou, 2021). BIK1 transduces the signal generated by recognition of flg22 and pep1  
415 by their respective PRRs and activates anion channels that cause stomata closure  
416 (Kadota et al., 2014; Li et al., 2014; Guzel Deger et al., 2015; Zheng et al., 2018;  
417 Thor et al., 2020). Similarly, PBL27, interacts with the chitin receptor CERK1 and  
418 upon chitin elicitation activates anion channels that cause stomata closure (Liu et al.,  
419 2019). RLCKs of the BSK subfamily were not examined in the context of stomatal  
420 movement, with the exception of the observation that *BSK5* mutant plants are  
421 hypersensitive to ABA in stomatal closure (Li et al., 2012b).

422 Comparison of gene expression profiles of *bsk830* mutant and wild-type tomato  
423 plants during the activation of PTI allowed us to formulate hypotheses about the  
424 molecular mechanisms of Bsk830 to regulate PTI responses. A prominent difference

425 between *bsk830* mutants and wild-type plants was differential expression of genes  
426 related to JA biosynthesis, catabolism, signaling, and response. JA regulates  
427 stomatal aperture by promoting their opening, as opposed to SA that promotes  
428 stomata closure in response to bacterial pathogens in Arabidopsis and tomato plants  
429 (Lee et al., 2013; Melotto et al., 2017; Guzman et al., 2020). Pathogens manipulate  
430 stomata aperture by secretion of JA mimicking molecules or effectors (Melotto et al.,  
431 2017). For example, *Pst* DC3000 secretes COR, a hormone mimic that closely  
432 resembles JA-Ile, that promotes degradation of JAZ proteins which negatively  
433 regulate transcription of JA-related genes and signaling (Zhang et al., 2017).  
434 Activation of the JA pathway leads to an inhibitory effect on accumulation of salicylic  
435 acid, which in turn promotes stomatal reopening (Melotto et al., 2017). Our  
436 expression profiles data indicates a release of negative regulation of JA signaling in  
437 the *bsk830* mutants compared to wild-type plants. This was confirmed by the lack of  
438 COR contribution to *Pst* DC3000 virulence in *bsk830* mutants, and their increased  
439 resistance to a fungal necrotrophic pathogen following PTI activation (Zhang et al.,  
440 2017). We therefore propose a model in which Bsk830 negatively regulates JA  
441 signaling and response that promote stomatal closure and ROS production (Yi et al.,  
442 2014; Toum et al., 2016). This is reminiscent of other regulators of plant immunity,  
443 such as FERONIA, which destabilizes MYC2, a regulator of JA signaling, to inhibit  
444 COR-induced signaling and promote disease resistance (Guo et al., 2018), and  
445 LINC1, which negatively regulates transcription of JA-related genes to enhance PTI  
446 (Jarad et al., 2020). In conclusion, our data reveal an important role for tomato  
447 Bsk830 in pre-invasion immunity initiated by flagellin perception and in regulation of  
448 JA signaling and response during PTI.

## 449 **MATERIALS AND METHODS**

### 450 **Plant materials and growth**

451 Plant cultivars used were: *Nicotiana benthamiana* (Goodin et al., 2008), and tomato  
452 (*Solanum lycopersicum*) Hawaii 7981 (Wang et al., 2011). *N. benthamiana* plants  
453 were grown in a phytochamber at 25°C in long-day conditions (16 h/8 h, light/dark).  
454 Tomato plants were grown in a greenhouse with temperatures fluctuating between  
455 25°C to 30°C under natural light conditions.

456

### 457 **Strains and growth conditions of bacteria, fungi, and yeast**

458 The strains used were: *Escherichia coli* DH5 $\alpha$  (Invitrogen) and Rosetta (MERCK),  
459 *Pseudomonas syringae* pv. *tomato* (*Pst*) DC3000 (Guo et al., 2009), *Pst*  
460 DC3000 $\Delta$ *fliC* (Kvitko et al., 2009), *Pst* DC3118 (Ma et al., 1991), *Pseudomonas*  
461 *fluorescens* A506 (Wilson et al., 2002), *Agrobacterium tumefaciens* GV2260  
462 (Deblaere et al., 1985) and LBA4404 (Ooms et al., 1982), *Botrytis cinerea* B05.10  
463 (Ma et al., 2017), and yeast (*Saccharomyces cerevisiae*) Y2HGold (Clontech).  
464 Bacterial, fungal, and yeast strains were grown with the appropriate antibiotics as  
465 follows: *E. coli* in Lysogeny broth (LB) medium at 37°C; *Pst*, *Pf*, and *A. tumefaciens*  
466 in LB at 30°C; *B. cinerea* in potato dextrose broth at 20°C; yeast in synthetically  
467 defined medium (6.7 g/L yeast nitrogen base without amino acids, 1.4 g/L amino acid  
468 drop-out mix) supplemented with 2% (w/v) glucose at 30°C.

469

### 470 **Pathogenicity assays**

471 Tomato plants were inoculated by vacuum-infiltration with bacterial suspensions of  
472  $1 \times 10^5$  CFU/mL in 10 mM MgCl<sub>2</sub> and 0.008% (v/v) Silwet L-77 (apart from *Pf* A506,  
473 which was inoculated at a concentration of  $1 \times 10^8$  CFU/mL), or by dipping into

474 bacterial suspensions of  $1 \times 10^7$  CFU/mL in 10 mM  $\text{MgCl}_2$  and 0.04% Silwet L-77.  
475 Plants inoculated by dipping were placed in a sealed transparent box to maintain  
476 humidity. Leaflets were with 3% (w/v) bleach, rinsed with water, and dried. Five  
477 samples of four leaf discs (1 cm diameter) were taken from three plants at 2 h after  
478 inoculation (day 0) and 2 days later, and homogenized in 1 mL of 10 mM  $\text{MgCl}_2$  to  
479 determine bacterial populations via serial dilution plating.

480 For tomato inoculation with *Botrytis cinerea*, droplets (7  $\mu\text{L}$ ) of 0.5X potato dextrose  
481 broth containing  $2 \times 10^5$  spores/mL were deposited on the leaf surface. The area of  
482 disease lesions was measured three days after inoculation.

483

#### 484 **Peptide elicitors**

485 Peptides flg22 (QRLSTGSRINSAKDDAAGLQIA; Krol et al., 2010) and flgII-28  
486 (ESTNILQRMRELAVQSRNDSNSSTDRDA; Clarke et al., 2013) were purchased  
487 from Integrated DNA Technologies, Inc., dissolved in water to a 5 mM stock solution,  
488 and diluted to the working concentration.

489

#### 490 ***A. tumefaciens*-mediated transient expression**

491 Overnight cultures of *A. tumefaciens* were pelleted, washed three times with 10 mM  
492  $\text{MgCl}_2$ , resuspended in induction medium (10 mM  $\text{MgCl}_2$ , 10 mM MES [pH 5.6], and  
493 200  $\mu\text{M}$  acetosyringone), and incubated with shaking for 3-4 h at 20°C. Cultures  
494 were diluted to  $\text{OD}_{600}=0.2$  and infiltrated into leaves of *N. benthamiana* plants using a  
495 needleless syringe.

496

#### 497 **Generation of CRISPR/Cas9-mediated knockout lines**

498 To generate tomato lines with mutations in the *Bsk830* gene, guide RNAs (gRNA1:  
499 GATTCTGAGCCTCGTGAATG; gRNA2: GTTTAACAGCAACCGGCCTC) targeting  
500 the first exon of *Bsk830* were designed using the tomato genome version SL2.5  
501 (Tomato Genome Consortium, 2012) and the Geneious R11 software  
502 (<https://www.geneious.com>). Each gRNA was cloned into a Cas9-expressing binary  
503 vector (p201N:Cas9; Jacobs et al., 2015) by Gibson assembly (Jacobs et al., 2017)  
504 and transformed into *A. tumefaciens* LBA4404. The obtained strains were pooled  
505 and used to transform Hawaii 7981 tomato plants at the Boyce Thompson Institute  
506 transformation facility (Frery and Van Eck, 2005). To determine the mutation type,  
507 genomic DNA was extracted from transgenic leaves using a modified CTAB method  
508 (Murray and Thompson, 1980). Genomic regions flanking the target site of the  
509 *Bsk830* gene were amplified with primers 15-16 (Supplemental Table S2) and  
510 sequenced.

511

### 512 **Yeast two-hybrid assay**

513 A GAL4 two-hybrid system was used to analyze protein-protein interactions in yeast.  
514 pGBKT7 vectors (bait) carrying tomato Bsk family members fused to the GAL4 DNA  
515 binding domain were as described (Roberts et al., 2019a). Gene fragments encoding  
516 the kinase domains of Fls2 (Fls2<sub>KD</sub>; amino acids 867 to 1,169) or Fls3 (Fls3<sub>KD</sub>; amino  
517 acids 854 to 1,140) were PCR-amplified from tomato cDNA using primers 3-4  
518 (Fls2<sub>KD</sub>) or 1-2 (Fls3<sub>KD</sub>) (Supplemental Table S2) and fused to the GAL4 activation  
519 domain in the pGADT7RecM vector (prey). Interactions were tested by placing  
520 droplets of yeast (10 µl) carrying bait and prey vectors on SD medium lacking Leu  
521 and Trp (SD-LW), SD-LW lacking His and adenine (SD-LWHA), or SD-LW  
522 supplemented with 25 µg/ml Aureobasidin A (SD-LW+AbA).

523

#### 524 **Split luciferase complementation assay**

525 Gene fragments encoding Fls<sub>2KD</sub> and Fls<sub>3KD</sub> were PCR-amplified from tomato cDNA  
526 using primers 7-8 (Fls<sub>2KD</sub>) or 5-6 (Fls<sub>3KD</sub>) (Supplemental Table S2), and cloned in  
527 frame to the C-terminal fragment of firefly luciferase in the binary vector  
528 pCAMBIA1300:C-LUC (Chen et al., 2008). Bsk830 was cloned in frame to the N-  
529 terminal fragment of firefly luciferase in the binary vector pCAMBIA1300:N-LUC  
530 (Chen et al., 2008), as described (Roberts et al., 2019a). The obtained vectors were  
531 transformed into *A. tumefaciens* GV2260 and co-expressed in *N. benthamiana*  
532 leaves. Split luciferase complementation assays were performed as described (Majhi  
533 et al., 2019).

534

#### 535 **Subcellular localization**

536 Gene fragments encoding *Bsk830*, *Bsk830*<sup>G2A</sup>, and *Bsk830*<sup>C(3,11,12)A</sup> were PCR-  
537 amplified from tomato cDNA using primers 9-10, 11-10, and 12-10, respectively  
538 (Supplemental Table S2). Amplified fragments were fused upstream of the coding  
539 region of the yellow fluorescence protein (YFP) in the pBTEX binary vector driven by  
540 the CaMV 35S promoter (Frederick et al., 1998; Popov et al., 2016). Fusion proteins  
541 were co-expressed with the plasma membrane marker Flot1b-mCherry (Li et al.,  
542 2012a) via *A. tumefaciens* GV2260 in *N. benthamiana* leaves and their localization  
543 was visualized by a Zeiss LSM780 confocal laser scanning microscope (Zeiss). YFP  
544 was excited with an argon laser at 514 nm, while mCherry and mRFP were excited  
545 with a DPSS561-10 laser at 561 nm. Emission was detected between 518 and 583  
546 nm for YFP, and between 579 and 650 nm for mCherry and mRFP. Images were  
547 processed with the image processing package Fiji (<https://fiji.sc/>).

548

549 **Expression of MBP fusion proteins in *E. coli* and *in vitro* kinase assay**

550 A gene fragment encoding Bsk830 was PCR-amplified from tomato cDNA using  
551 primers 13-14 (Supplemental Table S2), and cloned into the pMAL-c2x vector (New  
552 England Biolabs). Fls2<sub>CD</sub> (amino acids 841 to 1,169), and Fls3<sub>CD</sub> (amino acids 824 to  
553 1,140) MBP fusions in the pMAL-c2x vector were prepared as described (Roberts et  
554 al., 2020). Proteins were expressed in the Rosetta *E. coli* strain and purified (Majhi et  
555 al., 2019). MBP fusion proteins were incubated at 25°C for 1 h in a kinase assay  
556 solution containing 50 mM Tris-HCl (pH 7), 1 mM DTT, 10 mM MgCl<sub>2</sub>, 10 mM MnCl<sub>2</sub>,  
557 20 μM ATP, and 10 μCi [ $\gamma$ -<sup>32</sup>P]ATP (3,000 Ci mmol<sup>-1</sup>; Perkin-Elmer). Reactions were  
558 stopped by addition of the SDS sample buffer. Half of the reaction was fractionated  
559 by SDS-PAGE and stained with Coomassie Blue. The second half was fractionated  
560 by SDS-PAGE, blotted onto a PVDF membrane and exposed to autoradiography.

561

562 **Protein extraction**

563 Protein extraction from yeast and leaves was performed as described by Salomon  
564 and Sessa (2010) and Majhi et al. (2019), respectively.

565

566 **ROS production assay**

567 Leaf discs were placed in 200 μL of water overnight with the adaxial side up in 96-  
568 well plates. The next day, the water was replaced with a solution containing 100 nM  
569 flg22 or flgII-28, 34 μg mL<sup>-1</sup> luminol (Sigma-Aldrich), and 20 μg mL<sup>-1</sup> horseradish  
570 peroxidase (Sigma-Aldrich). Luminescence was measured with a Veritas Microplate  
571 Luminometer (Turnerbiosystems Veritas) for 30 min (flg22) or 45 min (flgII-28) at 2.5-  
572 or 3-min intervals, with a reading time of 2 sec per well.



573

574 **MAPK phosphorylation assay**

575 Leaf discs (~60 mg) were floated overnight in 10 mL water in 6-well-plates and then  
576 treated with 1  $\mu$ M flg22, 1  $\mu$ M flgII-28, or water. Total proteins were extracted in 150  
577  $\mu$ L extraction buffer (50 mM Tris-HCl [pH 7.5], 200 mM NaCl, 1 mM EDTA, 10 mM  
578 NaF, 1 mM Na<sub>2</sub>MoO<sub>4</sub>, 2 mM Na<sub>3</sub>VO<sub>4</sub>, 10% [v/v] glycerol, 2 mM DTT, and 1 mM  
579 PMSF). Proteins were fractionated by SDS-PAGE, transferred onto PDVF  
580 membranes, and immunoblotted with rabbit anti-pMAPK antibodies ( $\alpha$ -pMAPK; Cell  
581 Signaling Technology).

582

583 **Measurements of stomatal aperture and number**

584 Leaf pieces were cut from tomato leaflets and floated on stomatal buffer (25 mM  
585 MES-KOH [pH 6.15] and 10 mM KCl) for 3 h under light to allow stomata to fully  
586 open (Melotto et al., 2006; Guzman et al., 2020). Leaf pieces were then floated on  
587 water (control) and suspensions ( $1 \times 10^8$  CFU/mL) of *Pst* DC3000 or *Pf* A506. At the  
588 indicated times, leaf pieces were removed, dried with a filter paper, and placed on an  
589 Elite HD+ silicon rubber mixture (Zhermack) to create an impression of the leaf  
590 abaxial surface (Weyers and Johansen, 1985). Once hardened, the silicone rubber  
591 mixture was covered with clear nail varnish, which was allowed to dry, transferred to  
592 a glass slide, and observed under an Axio Zoom.V16 microscope (Zeiss). For each  
593 data point, the width and length of approximately 100-200 stomatal apertures were  
594 measured by using the Fiji package (<https://fiji.sc/>) and used to calculate the  
595 Stomatal Aperture Index. Images were also used to calculate the Stomata Number  
596 Index (Zhang et al., 2020).

597

## 598 **RNA-seq cDNA library preparation**

599 Total RNA was isolated with the RNeasy Plant Mini Kit (QIAGEN) from wild-type and  
600 *bsk830-1* tomato leaves inoculated by vacuum with *P. fluorescens* A506 or mock-  
601 inoculated (three biological replicates for treatment, in total 12 samples collected at 6  
602 h post-inoculation). RNA integrity was evaluated using the 4200 TapeStation System  
603 (Agilent Technologies). RNA-Seq cDNA libraries were prepared from RNA samples  
604 using the NEBNext Ultra™ II mRNA Library Prep Kit for Illumina and then PCR-  
605 amplified using NEBNext Multiplex Oligos for Illumina (New England Biolabs).  
606 Quality and average size of cDNAs in the library were evaluated using the 4200  
607 TapeStation System (Agilent Technologies).

608

## 609 **Next-generation sequencing and data analysis**

610 Libraries were sequenced using a NextSeq™ 500 system (Illumina) at the Genomics  
611 Research Unit of the Faculty of Life Sciences, Tel Aviv University. FASTQ files  
612 obtained from the sequencing were analyzed by Partek® Flow® 8.0 using the  
613 *Solanum lycopersicum* SL3.0 assembly (NCBI ID 393272). Raw reads with Phred  
614 quality scores of less than 20 were trimmed from the 3' end, followed by removal of  
615 adaptor sequences. High quality trimmed reads (Phred score ~34 and read length 75  
616 bp) were aligned to the reference genome by STAR 2.7.3a (Dobin et al., 2013).  
617 Gene expression quantification was performed using the Partek E/M algorithm (Xing  
618 et al., 2006), and normalized to RPKM (reads per kilobase of transcript per million  
619 mapped reads) (Mortazavi et al., 2008). Gene-specific analysis was performed on  
620 15,575 detected genes (false discovery rate [pFDR] < 0.05). Overlap of differentially  
621 expressed genes in wild-type and *bsk830-1* plants was visualized using the eulerr R  
622 package (Larsson, 2020). Gene ontology (GO) enrichment analysis was performed

623 using g:Profiler (version e105\_eg52\_p16\_e84549f) with a significance threshold of  
624  $pFDR < 0.05$  (Raudvere et al., 2019). The term size of functional categories was  
625 limited to 10-150 to exclude GO terms associated with general processes, and  
626 electronic GO annotations were discarded to increase GO term accuracy.

627

## 628 **Statistical analysis**

629 Experiments were performed at least three times. Statistical significance is based on  
630 either one- or two-way ANOVA followed by Tukey's post-hoc test performed in the R  
631 environment. The multcompView R package (Graves et al., 2019) was used to  
632 assign a compact letter display to indicate the statistical differences in post-hoc  
633 tests.

634

## 635 **Accession numbers**

636 Sequence data from this article can be found in the Solanaceae Genomics Network  
637 database (<https://solgenomics.net/>) under the following accession numbers: *Bsk880*  
638 (*Solyc01g080880*), *Bsk260* (*Solyc04g082260*), *Bsk600* (*Solyc06g076600*), *Bsk750*  
639 (*Solyc09g011750*), *Bsk000* (*Solyc10g085000*), *Bsk890* (*Solyc11g064890*), *Bsk830*  
640 (*Solyc12g099830*), *FIs2.1* (*Solyc02g070890*), *FIs2.2* (*Solyc02g070910*), *FIs3*  
641 (*Solyc04g009640*). RNA-seq reads generated in this work are available under  
642 accession number GSE199518 in the NCBI Gene Expression Omnibus (GEO)  
643 database.

644 **ACKNOWLEDGMENTS**

645 We thank Mary Beth Mudgett for providing the *Pst* DC3118 strain and Doron Teper  
646 for critical reading of the manuscript. This work was supported by grants from the  
647 United States-Israel Binational Agricultural Research and Development Fund  
648 (BARD; grant no. IS-4931-16C and IS-3541-21C to G.S. and G.B.M.) and the  
649 National Science Foundation (grant no. IOS-1546625 to G.B.M).

650

651 **AUTHOR CONTRIBUTIONS**

652 G.So., B.B.M., G.B.M., and G.S. conceived and designed the experimental plans  
653 and analyzed the data; B.B.M. performed the protein-protein interaction analyses,  
654 and G.So. performed all the other experiments; N.Z. and H.M.R. generated the  
655 *bsk830* mutant plants; M.P.C. analyzed the RNA-seq data; G.So. and G.S. wrote the  
656 article.

657 **REFERENCES**

- 658 **Andolfo G, Sanseverino W, Rombauts S, Peer Y, Bradeen JM, Carputo D,**  
659 **Frusciante L, Ercolano MR** (2013) Overview of tomato (*Solanum*  
660 *lycopersicum*) candidate pathogen recognition genes reveals important *Solanum*  
661 *R* locus dynamics. *New Phytol* **197**: 223–237
- 662 **Arnaud D, Hwang I** (2015) A sophisticated network of signaling pathways regulates  
663 stomatal defenses to bacterial pathogens. *Mol Plant* **8**: 566–581
- 664 **Attaran E, Major IT, Cruz JA, Rosa BA, Koo AJK, Chen J, Kramer DM, He SY,**  
665 **Howe GA** (2014) Temporal dynamics of growth and photosynthesis suppression  
666 in response to jasmonate signaling. *Plant Physiol* **165**: 1302–1314
- 667 **Chen H, Zou Y, Shang Y, Lin H, Wang Y, Cai R, Tang X, Zhou J-M** (2008) Firefly  
668 luciferase complementation imaging assay for protein-protein interactions in  
669 plants. *Plant Physiol* **146**: 368–376
- 670 **Clarke CR, Chinchilla D, Hind SR, Taguchi F, Miki R, Ichinose Y, Martin GB,**  
671 **Leman S, Felix G, Vinatzer BA** (2013) Allelic variation in two distinct  
672 *Pseudomonas syringae* flagellin epitopes modulates the strength of plant  
673 immune responses but not bacterial motility. *New Phytol* **200**: 847–860
- 674 **Deblaere R, Bytebier B, De Greve H, Deboeck F, Schell J, Van Montagu M,**  
675 **Leemans J** (1985) Efficient octopine Ti plasmid-derived vectors for  
676 *Agrobacterium*-mediated gene transfer to plants. *Nucleic Acids Res* **13**: 4777–  
677 4788
- 678 **DeFalco TA, Zipfel C** (2021) Molecular mechanisms of early plant pattern-triggered  
679 immune signaling. *Mol Cell* **81**: 3449–3467

- 680 **Dobin A, Davis CA, Schlesinger F, Drenkow J, Zaleski C, Jha S, Batut P,**  
681 **Chaisson M, Gingeras TR** (2013) STAR: ultrafast universal RNA-seq aligner.  
682 *Bioinformatics* **29**: 15–21
- 683 **Du M, Zhai Q, Deng L, Li S, Li H, Yan L, Huang Z, Wang B, Jiang H, Huang T, et**  
684 **al** (2014) Closely related NAC transcription factors of tomato differentially  
685 regulate stomatal closure and reopening during pathogen attack. *Plant Cell* **26**:  
686 3167–3184
- 687 **Du M, Zhao J, Tzeng DTW, Liu Y, Deng L, Yang T, Zhai Q, Wu F, Huang Z, Zhou**  
688 **M, et al** (2017) MYC2 orchestrates a hierarchical transcriptional cascade that  
689 regulates jasmonate-mediated plant immunity in tomato. *Plant Cell* **29**: 1883–  
690 1906
- 691 **Duxbury Z, Wu C, Ding P** (2021) A comparative overview of the intracellular  
692 guardians of plants and animals: NLRs in innate immunity and beyond. *Annu*  
693 *Rev Plant Biol* **72**: 155–184
- 694 **Frary A, Van Eck J** (2005) Organogenesis from transformed tomato explants.  
695 *Transgenic plants: methods and protocols* pp. 141–150
- 696 **Frederick RD, Thilmony RL, Sessa G, Martin GB** (1998) Recognition specificity for  
697 the bacterial avirulence protein AvrPto is determined by Thr-204 in the activation  
698 loop of the tomato Pto kinase. *Mol Cell* **2**: 241–245
- 699 **Gimenez-Ibanez S, Boter M, Fernández-Barbero G, Chini A, Rathjen JP, Solano**  
700 **R** (2014) The bacterial effector HopX1 targets JAZ transcriptional repressors to  
701 activate jasmonate signaling and promote infection in *Arabidopsis*. *PLoS Biol*  
702 **12**: e1001792

- 703 **Gimenez-Ibanez S, Boter M, Ortigosa A, García-Casado G, Chini A, Lewsey MG,**  
704 **Ecker JR, Ntoukakis V, Solano R** (2017) JAZ2 controls stomata dynamics  
705 during bacterial invasion. *New Phytol* **213**: 1378–1392
- 706 **Gómez-Gómez L, Boller T** (2000) FLS2: an LRR receptor-like kinase involved in the  
707 perception of the bacterial elicitor flagellin in *Arabidopsis*. *Mol Cell* **5**: 1003–11
- 708 **Goodin MM, Zaitlin D, Naidu RA, Lommel SA** (2008) *Nicotiana benthamiana*: its  
709 history and future as a model for plant-pathogen interactions. *Mol Plant Microbe*  
710 *Interact* **21**: 1015–1026
- 711 **Graves S, Piepho HP, Selzer L** (2019) multcompView: Visualizations of paired  
712 comparisons. R package version 0.1-8. Available at: [https://cran.r-](https://cran.r-project.org/package=multcompView)  
713 [project.org/package=multcompView](https://cran.r-project.org/package=multcompView).
- 714 **Guo H, Nolan TM, Song G, Liu S, Xie Z, Chen J, Schnable PS, Walley JW, Yin Y**  
715 (2018) FERONIA receptor kinase contributes to plant immunity by suppressing  
716 jasmonic acid signaling in *Arabidopsis thaliana*. *Curr Biol* **28**: 3316-3324.e6
- 717 **Guo M, Tian F, Wamboldt Y, Alfano JR** (2009) The majority of the type III effector  
718 inventory of *Pseudomonas syringae* pv. *tomato* DC3000 can suppress plant  
719 immunity. *Mol Plant-Microbe Interact* **22**: 1069–1080
- 720 **Guzel Deger A, Scherzer S, Nuhkat M, Kedzierska J, Kollist H, Brosché M,**  
721 **Unyayar S, Boudsocq M, Hedrich R, Roelfsema MRG** (2015) Guard cell  
722 SLAC1-type anion channels mediate flagellin-induced stomatal closure. *New*  
723 *Phytol* **208**: 162–173
- 724 **Guzman AR, Kim J-G, Taylor KW, Lanver D, Mudgett MB** (2020) Tomato Atypical  
725 Receptor Kinase1 is involved in the regulation of preinvasion defense. *Plant*

- 726           Physiol **183**: 1306–1318
- 727       **Hind SR, Strickler SR, Boyle PC, Dunham DM, Bao Z, O’Doherty IM, Baccile JA,**  
728           **Hoki JS, Viox EG, Clarke CR, et al** (2016a) Tomato receptor FLAGELLIN-  
729           SENSING 3 binds flgII-28 and activates the plant immune system. Nat Plants **2**:  
730           1–8
- 731       **Jacobs TB, LaFayette PR, Schmitz RJ, Parrott WA** (2015) Targeted genome  
732           modifications in soybean with CRISPR/Cas9. BMC Biotechnol **15**: 16
- 733       **Jacobs TB, Zhang N, Patel D, Martin GB** (2017) Generation of a collection of  
734           mutant tomato lines using pooled CRISPR libraries. Plant Physiol **174**: 2023–  
735           2037
- 736       **Jarad M, Mariappan K, Almeida-Trapp M, Mette MF, Mithöfer A, Rayapuram N,**  
737           **Hirt H** (2020) The Lamin-Like LITTLE NUCLEI 1 (LINC1) regulates pattern-  
738           triggered immunity and jasmonic acid signaling. Front Plant Sci. 1639
- 739       **Jia Z, Giehl RFH, Meyer RC, Altmann T, von Wirén N** (2019) Natural variation of  
740           BSK3 tunes brassinosteroid signaling to regulate root foraging under low  
741           nitrogen. Nat Commun **10**: 2378
- 742       **Jiang S, Yao J, Ma K-W, Zhou H, Song J, He SY, Ma W** (2013) Bacterial effector  
743           activates jasmonate signaling by directly targeting JAZ transcriptional  
744           repressors. PLoS Pathog **9**: e1003715
- 745       **Kadota Y, Sklenar J, Derbyshire P, Stransfeld L, Asai S, Ntoukakis V, Jones JD,**  
746           **Shirasu K, Menke F, Jones A, et al** (2014a) Direct regulation of the NADPH  
747           oxidase RBOHD by the PRR-associated kinase BIK1 during plant immunity. Mol  
748           Cell **54**: 43–55



- 749 **Katsir L, Schillmiller AL, Staswick PE, He SY, Howe GA** (2008) COI1 is a critical  
750 component of a receptor for jasmonate and the bacterial virulence factor  
751 coronatine. *Proc Natl Acad Sci* **105**: 7100–7105
- 752 **Krol E, Mentzel T, Chinchilla D, Boller T, Felix G, Kemmerling B, Postel S,**  
753 **Arents M, Jeworutzki E, Al-Rasheid KAS, et al** (2010) Perception of the  
754 *Arabidopsis* danger signal peptide 1 involves the pattern recognition receptor  
755 AtPEPR1 and its close homologue AtPEPR2. *J Biol Chem* **285**: 13471–13479
- 756 **Kvitko BH, Park DH, Velásquez AC, Wei C-F, Russell AB, Martin GB, Schneider**  
757 **DJ, Collmer A** (2009) Deletions in the repertoire of *Pseudomonas syringae* pv.  
758 *tomato* DC3000 type III secretion effector genes reveal functional overlap  
759 among effectors. *PLoS Pathog* **5**: e1000388
- 760 **Larsson J** (2020) eulerr: Area-proportional euler and venn diagrams with ellipses. R  
761 package version 6.1.0. Available at: <https://cran.r-project.org/package=eulerr>.
- 762 **Lee S, Ishiga Y, Clermont K, Mysore KS** (2013) Coronatine inhibits stomatal  
763 closure and delays hypersensitive response cell death induced by nonhost  
764 bacterial pathogens. *PeerJ* **1**: e34
- 765 **Li L, Li M, Yu L, Zhou Z, Liang X, Liu Z, Cai G, Gao L, Zhang X, Wang Y, et al.**  
766 (2014) The FLS2-associated kinase BIK1 directly phosphorylates the NADPH  
767 oxidase RbohD to control plant immunity. *Cell Host Microbe* **15**: 329–338
- 768 **Li R, Liu P, Wan Y, Chen T, Wang Q, Mettbach U, Baluška F, Šamaj J, Fang X,**  
769 **Lucas WJ, et al.** (2012a) A membrane microdomain-associated protein,  
770 *Arabidopsis* Flot1, is involved in a clathrin-independent endocytic pathway and  
771 is required for seedling development. *Plant Cell* **24**: 2105–2122

- 772 **Li ZY, Xu ZS, He GY, Yang GX, Chen M, Li LC, Ma YZ** (2012b) A mutation in  
773 *Arabidopsis BSK5* encoding a brassinosteroid-signaling kinase protein affects  
774 responses to salinity and abscisic acid. *Biochem Biophys Res Commun* **426**:  
775 522–527
- 776 **Liang X, Zhou J-M** (2018) Receptor-like cytoplasmic kinases: Central players in  
777 plant receptor kinase-mediated signaling. *Annu Rev Plant Biol* **69**: 267–299
- 778 **Liu Y, Maierhofer T, Rybak K, Sklenar J, Breakspear A, Johnston MG,**  
779 **Fliegmann J, Huang S, Roelfsema MRG, Felix G, et al** (2019) Anion channel  
780 SLAH3 is a regulatory target of chitin receptor-associated kinase PBL27 in  
781 microbial stomatal closure. *Elife*. **8**: e44474
- 782 **Ma L, Salas O, Bowler K, Oren-Young L, Bar-Peled M, Sharon A** (2017) Genetic  
783 alteration of UDP-rhamnose metabolism in *Botrytis cinerea* leads to the  
784 accumulation of UDP-KDG that adversely affects development and  
785 pathogenicity. *Mol Plant Pathol* **18**: 263–275
- 786 **Ma SW, Morris, VL, Cuppels DA** (1991) Characterization of a DNA region required  
787 for production of the phytotoxin coronatine by *Pseudomonas syringae* pv.  
788 *tomato*. *Mol Plant-Microbe Interact* **4**: 69
- 789 **Majhi BB, Sobol G, Gachie S, Sreeramulu S, Sessa G** (2021)  
790 BRASSINOSTEROID-SIGNALING KINASES 7 and 8 associate with the FLS2  
791 immune receptor and are required for flg22-induced PTI responses. *Mol Plant*  
792 *Pathol* **22**: 786–799
- 793 **Majhi BB, Sreeramulu S, Sessa G** (2019) BRASSINOSTEROID-SIGNALING  
794 KINASE5 associates with immune receptors and is required for immune  
795 responses. *Plant Physiol* **180**: 1166–1184

- 796 **Melotto M, Underwood W, Koczan J, Nomura K, He SY** (2006) Plant stomata  
797 function in innate immunity against bacterial invasion. *Cell* **126**: 969–980
- 798 **Melotto M, Zhang L, Oblessuc PR, He SY** (2017) Stomatal defense a decade later.  
799 *Plant Physiol* **174**: 561–571
- 800 **Mortazavi A, Williams BA, McCue K, Schaeffer L, Wold B** (2008) Mapping and  
801 quantifying mammalian transcriptomes by RNA-Seq. *Nat Methods* **5**: 621–628
- 802 **Murray MG, Thompson WF** (1980) Rapid isolation of high molecular weight plant  
803 DNA. *Nucleic Acids Res* **8**: 4321–4326
- 804 **Ooms G, Hooykaas PJJ, Van Veen RJM, Van Beelen P, Regensburg-Tuïnk TJG,**  
805 **Schilperoort RA** (1982) Octopine Ti-plasmid deletion mutants of *Agrobacterium*  
806 *tumefaciens* with emphasis on the right side of the T-region. *Plasmid* **7**: 15–29
- 807 **Popov G, Fraiture M, Brunner F, Sessa G** (2016) Multiple *Xanthomonas*  
808 *euvesicatoria* type III effectors inhibit flg22-triggered immunity. *Mol Plant*  
809 *Microbe Interact* **29**: 651–660
- 810 **Rao S, Zhou Z, Miao P, Bi G, Hu M, Wu Y, Feng F, Zhang X, Zhou J-M** (2018)  
811 Roles of receptor-like cytoplasmic kinase VII members in pattern-triggered  
812 immune signaling. *Plant Physiol* **177**: 1679-1690
- 813 **Raudvere U, Kolberg L, Kuzmin I, Arak T, Adler P, Peterson H, Vilo J** (2019)  
814 g:Profiler: a web server for functional enrichment analysis and conversions of  
815 gene lists (2019 update). *Nucleic Acids Res* **47**: W191–W198
- 816 **Ren H, Willige BC, Jaillais Y, Geng S, Park MY, Gray WM, Chory J** (2019)  
817 BRASSINOSTEROID-SIGNALING KINASE 3, a plasma membrane-associated  
818 scaffold protein involved in early brassinosteroid signaling. *PLOS Genet* **15**:

819 e1007904

820 **Robatzek S, Bittel P, Chinchilla D, Köchner P, Felix G, Shiu S-H, Boller T (2007)**

821 Molecular identification and characterization of the tomato flagellin receptor

822 LeFLS2, an orthologue of *Arabidopsis* FLS2 exhibiting characteristically different

823 perception specificities. *Plant Mol Biol* **64**: 539–47

824 **Roberts R, Hind SR, Pedley KF, Diner BA, Szarzanowicz MJ, Luciano-Rosario**

825 **D, Majhi BB, Popov G, Sessa G, Oh C-S, et al. (2019a)** Mai1 protein acts

826 between host recognition of pathogen effectors and mitogen-activated protein

827 kinase signaling. *Mol Plant-Microbe Interact* **32**: 1496–1507

828 **Roberts R, Mainiero S, Powell AF, Liu AE, Shi K, Hind SR, Strickler SR, Collmer**

829 **A, Martin GB (2019b)** Natural variation for unusual host responses and flagellin-

830 mediated immunity against *Pseudomonas syringae* in genetically diverse tomato

831 accessions. *New Phytol* **223**: 447–461

832 **Roberts R, Liu AE, Wan L, Geiger AM, Hind SR, Rosli HG, Martin GB (2020)**

833 Molecular characterization of differences between the tomato immune receptors

834 Flagellin sensing 3 and Flagellin sensing 2. *Plant Physiol* **183**: 1825–1837

835 **Rosli HG, Zheng Y, Pombo MA, Zhong S, Bombarely A, Fei Z, Collmer A, Martin**

836 **GB (2013)** Transcriptomics-based screen for genes induced by flagellin and

837 repressed by pathogen effectors identifies a cell wall-associated kinase involved

838 in plant immunity. *Genome Biol* **14**: 1-15

839 **Salomon D, Sessa G (2010)** Identification of growth inhibition phenotypes induced

840 by expression of bacterial type III effectors in yeast. *J Vis Exp.* **37**: e1865

841 **Sasaki-Sekimoto Y, Jikumaru Y, Obayashi T, Saito H, Masuda S, Kamiya Y,**

- 842 **Ohta H, Shirasu K** (2013) Basic helix-loop-helix transcription factors  
843 JASMONATE-ASSOCIATED MYC2-LIKE1 (JAM1), JAM2, and JAM3 are  
844 negative regulators of jasmonate responses in arabidopsis. *Plant Physiol* **163**:  
845 291–304
- 846 **Shi H, Li Q, Luo M, Yan H, Xie B, Li X, Zhong G, Chen D, Tang D** (2022)  
847 BRASSINOSTEROID-SIGNALING KINASE1 modulates MAP KINASE15  
848 phosphorylation to confer powdery mildew resistance in *Arabidopsis*. *Plant Cell*.
- 849 **Shi H, Shen Q, Qi Y, Yan H, Nie H, Chen Y, Zhao T, Katagiri F, Tang D** (2013)  
850 BR-SIGNALING KINASE1 physically associates with FLAGELLIN SENSING2  
851 and regulates plant innate immunity in *Arabidopsis*. *Plant Cell* **25**: 1143–1157
- 852 **Sierla M, Waszczak C, Vahisalu T, Kangasjärvi J** (2016) Reactive oxygen species  
853 in the regulation of stomatal movements. *Plant Physiol* **171**: 1569–1580
- 854 **Singh DK, Calviño M, Brauer EK, Fernandez-Pozo N, Strickler S, Yalamanchili**  
855 **R, Suzuki H, Aoki K, Shibata D, Stratmann JW, et al.** (2014) The tomato  
856 kinome and the tomato kinase library ORFeome: Novel resources for the study  
857 of kinases and signal transduction in tomato and *Solanaceae* species. *Mol*  
858 *Plant-Microbe Interact* **27**: 7–17
- 859 **Smirnova E, Marquis V, Poirier L, Aubert Y, Zumsteg J, Ménard R, Miesch L,**  
860 **Heitz T** (2017) Jasmonic Acid Oxidase 2 hydroxylates jasmonic acid and  
861 represses basal defense and resistance responses against *Botrytis cinerea*  
862 infection. *Mol Plant* **10**: 1159–1173
- 863 **Sreeramulu S, Mostizky Y, Sunitha S, Shani E, Nahum H, Salomon D, Hayun L**  
864 **Ben, Gruetter C, Rauh D, Ori N, et al.** (2013) BSKs are partially redundant  
865 positive regulators of brassinosteroid signaling in *Arabidopsis*. *Plant J* **74**: 905–

866 919

867 **Su B, Wang A, Shan X** (2022) The role of *N*-myristoylation in homeostasis of  
868 brassinosteroid signaling kinase 1. *Planta* **255**: 73

869 **Su B, Zhang X, Li L, Abbas S, Yu M, Cui Y, Baluška F, Hwang I, Shan X, Lin J**  
870 (2021) Dynamic spatial reorganization of BSK1 complexes in the plasma  
871 membrane underpins signal-specific activation for growth and immunity. *Mol*  
872 *Plant* **14**: 588–603

873 **Tang W, Kim T-W, Osés-Prieto JA, Sun Y, Deng Z, Zhu S, Wang R, Burlingame**  
874 **AL, Wang Z-Y** (2008) BSKs mediate signal transduction from the receptor  
875 kinase BRI1 in *Arabidopsis*. *Science* **321**: 557–60

876 **Thaler JS, Humphrey PT, Whiteman NK** (2012) Evolution of jasmonate and  
877 salicylate signal crosstalk. *Trends Plant Sci* **17**: 260–270

878 **Thor K, Jiang S, Michard E, George J, Scherzer S, Huang S, Dindas J,**  
879 **Derbyshire P, Leitão N, DeFalco TA, et al** (2020) The calcium-permeable  
880 channel OSCA1.3 regulates plant stomatal immunity. *Nature* **585**: 569–573

881 **Tian W, Hou C, Ren Z, Wang C, Zhao F, Dahlbeck D, Hu S, Zhang L, Niu Q, Li L,**  
882 **et al** (2019) A calmodulin-gated calcium channel links pathogen patterns to  
883 plant immunity. *Nature* **572**: 131–135

884 **Tomato Genome Consortium** (2012) The tomato genome sequence provides  
885 insights into fleshy fruit evolution. *Nature* **485**: 635–641

886 **Toum L, Torres PS, Gallego SM, Benavides MP, Vojnov AA, Gudesblat GE**  
887 (2016) Coronatine inhibits stomatal closure through guard cell-specific inhibition  
888 of NADPH oxidase-dependent ROS production. *Front Plant Sci.* 1851

- 889 **Vanholme R, De Meester B, Ralph J, Boerjan W** (2019) Lignin biosynthesis and its  
890 integration into metabolism. *Curr Opin Biotechnol* **56**: 230-239.
- 891 **Wang H, Hutton SF, Robbins MD, Sim S-C, Scott JW, Yang W, Jones JB,**  
892 **Francis DM** (2011) Molecular mapping of hypersensitive resistance from tomato  
893 ‘Hawaii 7981’ to *Xanthomonas perforans* race T3. *Phytopathology* **101**: 1217–  
894 1223
- 895 **Wang L, Albert M, Einig E, Fürst U, Krust D, Felix G** (2016) The pattern-  
896 recognition receptor CORE of Solanaceae detects bacterial cold-shock protein.  
897 *Nat Plants* **2**: 16185
- 898 **Wang Z, Gou X** (2021) The first line of defense: Receptor-like protein kinase-  
899 mediated stomatal immunity. *Int J Mol Sci* **23**: 343
- 900 **Wasternack C, Song S** (2016) Jasmonates: biosynthesis, metabolism, and signaling  
901 by proteins activating and repressing transcription. *J Exp Bot* **68**: 1303-1321
- 902 **Weyers JDB, Johansen LG** (1985) Accurate estimation of stomatal aperture from  
903 silicone rubber impressions. *New Phytol* **101**: 109–115
- 904 **Wilson M, Campbell HL, Ji P, Jones JB, Cuppels DA** (2002) Biological control of  
905 bacterial speck of tomato under field conditions at several locations in north  
906 america. *Phytopathology* **92**: 1284–1292
- 907 **Xing Y** (2006) An expectation-maximization algorithm for probabilistic  
908 reconstructions of full-length isoforms from splice graphs. *Nucleic Acids Res* **34**:  
909 3150–3160
- 910 **Xu P, Xu S-L, Li Z-J, Tang W, Burlingame AL, Wang Z-Y** (2014) A  
911 brassinosteroid-signaling kinase interacts with multiple receptor-like kinases in

- 912 *Arabidopsis*. Mol Plant **7**: 441–444
- 913 **Yan H, Zhao Y, Shi H, Li J, Wang Y, Tang D** (2018) BRASSINOSTEROID-  
914 SIGNALING KINASE1 phosphorylates MAPKKK5 to regulate immunity in  
915 *Arabidopsis*. Plant Physiol **176**: 2991-3002
- 916 **Yi SY, Shirasu K, Moon JS, Lee S-G, Kwon S-Y** (2014) The activated SA and JA  
917 signaling pathways have an influence on flg22-triggered oxidative burst and  
918 callose deposition. PLoS One **9**: e88951
- 919 **Zhang L, Zhang F, Melotto M, Yao J, He SY** (2017) Jasmonate signaling and  
920 manipulation by pathogens and insects. J Exp Bot **68**: 1371-1385
- 921 **Zhang N, Pombo MA, Rosli HG, Martin GB** (2020) Tomato wall-associated kinase  
922 SIWak1 depends on Fls2/Fls3 to promote apoplastic immune responses to  
923 *Pseudomonas syringae*. Plant Physiol **183**: 1869–1882
- 924 **Zheng X, Kang S, Jing Y, Ren Z, Li L, Zhou J-M, Berkowitz G, Shi J, Fu A, Lan W,**  
925 **et al** (2018) Danger-associated peptides close stomata by OST1-independent  
926 activation of anion channels in guard cells. Plant Cell **30**: 1132–1146
- 927 **Zheng X, Spivey NW, Zeng W, Liu P-P, Fu ZQ, Klessig DF, He SY, Dong X**  
928 (2012) Coronatine promotes *Pseudomonas syringae* virulence in plants by  
929 activating a signaling cascade that inhibits salicylic acid accumulation. Cell Host  
930 Microbe **11**: 587–596
- 931 **Zipfel C, Robatzek S, Navarro L, Oakeley EJ, Jones JDG, Felix G, Boller T**  
932 (2004) Bacterial disease resistance in *Arabidopsis* through flagellin perception.  
933 Nature **428**: 764–767
- 934



935 **Table 1.** Functional categories overrepresented in DEGs of *Pf* treated *bsk830* plants.

| <b>Up-regulated genes</b>                              |                |                                         |
|--------------------------------------------------------|----------------|-----------------------------------------|
| <b>Term name</b>                                       | <b>Term ID</b> | <b><math>-\log_{10}(p_{adj})</math></b> |
| response to chitin                                     | GO:0010200     | 5.53039                                 |
| regulation of jasmonic acid mediated signaling pathway | GO:2000022     | 5.42490                                 |
| cellular response to fatty acid                        | GO:0071398     | 4.02940                                 |
| jasmonic acid mediated signaling pathway               | GO:0009867     | 3.47824                                 |
| cellular response to jasmonic acid stimulus            | GO:0071395     | 3.37033                                 |
| lignin metabolic process                               | GO:0009808     | 3.19087                                 |
| regulation of defense response to insect               | GO:2000068     | 3.18180                                 |
| phenylpropanoid metabolic process                      | GO:0009698     | 2.80966                                 |
| phenylpropanoid biosynthetic process                   | GO:0009699     | 2.19778                                 |
| regulation of anion channel activity                   | GO:0010359     | 2.09635                                 |
| <b>Down-regulated genes</b>                            |                |                                         |
| <b>Term name</b>                                       | <b>Term ID</b> | <b><math>-\log_{10}(p_{adj})</math></b> |
| photosynthesis, light reaction                         | GO:0019684     | 44.88674                                |
| photosynthetic electron transport chain                | GO:0009767     | 21.43202                                |
| photosynthesis, light harvesting                       | GO:0009765     | 17.15130                                |
| photosynthesis, light harvesting in photosystem I      | GO:0009768     | 14.07682                                |
| electron transport chain                               | GO:0022900     | 14.04188                                |
| photosynthetic electron transport in photosystem I     | GO:0009773     | 13.60706                                |
| NAD(P)H dehydrogenase complex assembly                 | GO:0010275     | 11.56992                                |
| photosystem II assembly                                | GO:0010207     | 7.293742                                |
| response to high light intensity                       | GO:0009644     | 5.682999                                |
| glucose metabolic process                              | GO:0006006     | 5.284815                                |

936 **FIGURE LEGENDS**

937 **Figure 1.** Interaction of Bsk830 with Fls2 and Fls3. A, Yeast cells expressing  
938 individual Bsk proteins fused to the GAL4 DNA-binding domain (bait), and the kinase  
939 domain of Fls2 (Fls2<sub>KD</sub>) and Fls3 (Fls3<sub>KD</sub>) fused to the GAL4 DNA-activation domain  
940 (prey) were grown on synthetically defined medium lacking Leu and Trp (SD–LW),  
941 SD–LW lacking His and Ade (SD–LWHA), or SD–LW supplemented with  
942 Aureobasidin A (SD–LW+AbA). Empty vectors (EV) were used as negative controls.  
943 Nomenclature and accession numbers of tomato Bsk family members are reported in  
944 the Materials and Methods section. B, The indicated proteins were fused to C-LUC  
945 or N-LUC and co-expressed via *A. tumefaciens* GV2260 in *N. benthamiana* leaves.  
946 Luciferase activity was quantified by measuring relative luminescence at 48 h after  
947 agro-infiltration. Data from three independent experiments is shown. Circles  
948 represent individual data points, and letters represent statistical significance  
949 determined by one-way ANOVA and Tukey's post-hoc test ( $P < 0.05$ ).

950

951 **Figure 2.** Bsk830 localizes to the plasma membrane. A, Putative myristoylation and  
952 palmitoylation sites at the N-terminus of Bsk830. Bsk830-YFP (B), Bsk830<sup>G2A</sup>-YFP  
953 (C), or Bsk830<sup>C(3,11,12)A</sup>-YFP (C) fusion proteins were co-expressed via *A.*  
954 *tumefaciens* GV2260 in *N. benthamiana* leaves with the plasma membrane marker  
955 Flot1b-mCherry. Fluorescence was monitored in epidermal cells by confocal  
956 microscopy at 48 h after agro-infiltration. YFP, mCherry, and merged fluorescence  
957 images are shown. The region marked in the merged image by a dotted square is  
958 magnified in the inset panel. Fluorescence intensity was measured in the YFP and  
959 mCherry channels along the dotted line. Scale bars represents 20  $\mu\text{m}$ , except for the  
960 inset image, where it represents 10  $\mu\text{m}$ .

961

962 **Figure 3.** *Bsk830* is required for flagellin-mediated immunity. A, Wild-type and  
963 *bsk830* mutant plants were inoculated by dipping into a bacterial suspension  
964 ( $10^7$  CFU mL<sup>-1</sup>) of *Pst* DC3000 or *Pst* DC3000 $\Delta$ *fliC*. Bacterial populations were  
965 measured in leaves at 0 and 2 days post-inoculation (dpi). Circles represent  
966 individual data points of three biological replicates, and letters represent statistical  
967 significance determined by two-way ANOVA and Tukey's post-hoc test ( $P < 0.05$ ). B  
968 and C, ROS production. Leaf discs were treated with 100 nM of flg22, flgII-28, or  
969 water. Luminescence was measured for 30 min after flg22 treatment (B) and for 45  
970 min after flgII-28 treatment (C). ROS production was normalized to the ROS amount  
971 produced by wild-type plants at its peak. Data are means  $\pm$  SD of three biological  
972 replicates.

973

974 **Figure 4.** *bsk830* mutant plants are compromised in stomatal immunity. A and B,  
975 Wild-type and *bsk830* mutant plants were inoculated with *Pst* DC3000 by dipping  
976 ( $10^7$  CFU mL<sup>-1</sup>) (A) or vacuum-infiltration ( $10^5$  CFU mL<sup>-1</sup>) (B). Bacterial populations  
977 were measured in leaves at 0 and 2 days post-inoculation (dpi). Data from three  
978 independent experiments is shown. C and D, Stomatal aperture index (aperture  
979 width divided by the stomata length) was determined in leaves after 0, 1, 2.5, and 4 h  
980 floating on suspensions ( $10^8$  CFU mL<sup>-1</sup>) of *Pst* DC3000 (C) and *Pf* A506 (D), or  
981 water (mock). Circles represent mean of three biological replicates. Letters represent  
982 statistical significance determined by one-way (A and B) or two-way (C and D)  
983 ANOVA and Tukey's post-hoc test ( $P < 0.05$ ).

984

985 **Figure 5.** A, Euler diagram representing differentially expressed genes (DEGs)  
986 (pFDR < 0.05, fold change > 3, *Pf* vs. mock treatment comparison) in wild-type and  
987 *bsk830-1* plants. B, Loss of function in *Bsk830* alters expression of genes involved in  
988 JA biosynthesis, catabolism, signaling, and response. Each row represents a single  
989 gene accompanied by its Solanaceae Genomics Network accession number. Genes  
990 not characterized in tomato are annotated with name of the *Arabidopsis* gene with  
991 the highest protein similarity obtained by BLAST. The legend corresponds to relative  
992 log<sub>2</sub> fold change values calculated based on a *Pf* vs. mock treatment comparison  
993 performed for either wild-type or the *bsk830* mutant line. Grey rectangles represent  
994 genes with no fold change value available.

995

996 **Figure 6.** A, Plants of the indicated genotypes were inoculated by dipping with a 10<sup>7</sup>  
997 CFU mL<sup>-1</sup> bacterial suspension of *Pst* DC3000 (COR+) or *Pst* DC3118 (COR-).  
998 Bacterial populations in leaves were measured at 0 and 2 dpi. B, Plants of the  
999 indicated genotypes were vacuum-infiltrated with a *Pf* A506 suspension (10<sup>8</sup> CFU  
1000 mL<sup>-1</sup>). After 24 h, plants were inoculated by placing a droplet of a suspension  
1001 carrying *Botrytis cinerea* spores (2 × 10<sup>5</sup> conidia mL<sup>-1</sup>). Lesion area was measured  
1002 at 3 dpi. In (A and B) data from three independent experiments is shown. Letters  
1003 represent statistical significance determined by two-way ANOVA and Tukey's post-  
1004 hoc test (*P* < 0.05).

1005 **SUPPLEMENTAL TABLES AND FIGURE LEGENDS**

1006 **Supplemental Table S1.** List of differentially expressed genes.

1007

1008 **Supplemental Table S2.** Primers used in this study.

1009

1010 **Supplemental Figure S1.** A, Expression in yeast of the kinase domain of Fls2  
1011 (Fls2<sub>KD</sub>) and Fls3 (Fls3<sub>KD</sub>) fused to the GAL4 DNA-activation domain (GAL4-AD). B,  
1012 Expression in leaves of *N. benthamiana* plants of Fls2<sub>KD</sub> and Fls3<sub>KD</sub> fused to the C-  
1013 terminal half (C-LUC) of the luciferase protein. Proteins were detected by  
1014 immunoblot analysis using anti-HA antibodies ( $\alpha$ -HA) or anti-luciferase antibodies ( $\alpha$ -  
1015 LUC).

1016

1017 **Supplemental Figure S2.** Bsk830 is not phosphorylated *in vitro* by Fls2 and Fls3.  
1018 Phosphorylation of the maltose binding protein (MBP)-Bsk830 fusion by the  
1019 cytoplasmic domain of Fls2 (Fls2<sub>CD</sub>) and Fls3 (Fls3<sub>CD</sub>) fused to MBP was assayed *in*  
1020 *vitro* in the presence of [ $\gamma$ -<sup>32</sup>P]ATP. Proteins were fractionated by SDS-PAGE, blotted  
1021 onto a PVDF membrane and exposed to autoradiography, or stained with  
1022 Coomassie Blue.

1023

1024 **Supplemental Figure S3.** Sequence of the *Bsk830* deletions in the tomato *bsk830-1*  
1025 and *bsk830-2* mutant lines. Multiple sequence alignment of the *Bsk830* region  
1026 flanking the gRNA-targeted site in wild-type, *bsk830-1*, and *bsk830-2* plants. In  
1027 green, the ATG translation start site; in blue, the PAM motif; in pink, the gRNA. A red  
1028 dotted line represents sequences deleted in the mutant lines.

1029

1030 **Supplemental Figure S4.** Tomato *bsk830* mutant plants are not impaired in flg22-  
1031 and flgII-28-induced MAPK activation. Leaf discs of wild-type, *bsk830-1*, *bsk830-2*,  
1032 *fls2.1/fls2.2* and *fls3* mutant plants were floated overnight in water and treated with 1  
1033  $\mu$ M of flg22 (A) or flgII-28 (B). Samples were harvested at 0, 5 and 20 min after  
1034 treatment and analyzed by immunoblots with anti-pMAPK antibodies ( $\alpha$ -pMAPK).  
1035 Ponceau S staining of RuBisCO is shown as a loading control. Data are  
1036 representative of three biological repeats.

1037

1038 **Supplemental Figure S5.** Stomatal number index of wild-type, *bsk830-1*, and  
1039 *bsk830-2* tomato plants. The number of stomata and epidermal pavement cells was  
1040 manually counted in a 0.5 mm<sup>2</sup> leaf area and the stomatal number index was  
1041 calculated as the percentage of stomata per total cells. Approximately 30 images  
1042 were analyzed for each plant genotype.

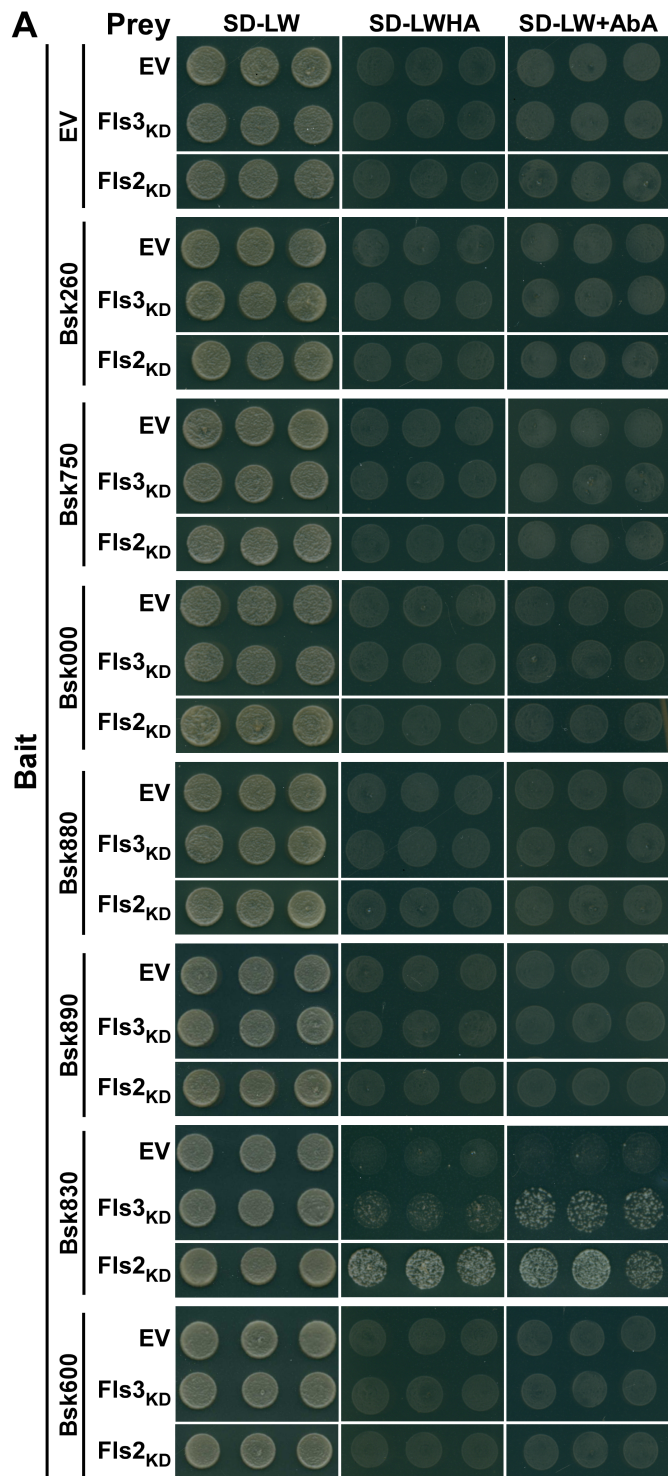

**Figure 1.** Interaction of Bsk830 with Fls2 and Fls3. **A,** Yeast cells expressing individual Bsk proteins fused to the GAL4 DNA-binding domain (bait), and the kinase domain of Fls2 (Fls2<sub>KD</sub>) and Fls3 (Fls3<sub>KD</sub>) fused to the GAL4 DNA-activation domain (prey) were grown on synthetically defined medium lacking Leu and Trp (SD-LW), SD-LW lacking His and Ade (SD-LWHA), or SD-LW supplemented with Aureobasidin A (SD-LW+AbA). Empty vectors (EV) were used as negative controls. Nomenclature and accession numbers of tomato Bsk family members are reported in the Materials and Methods section. **B,** The indicated proteins were fused to C-LUC or N-LUC and co-expressed via *A. tumefaciens* GV2260 in *N. benthamiana* leaves. Luciferase activity was quantified by measuring relative luminescence at 48 h after agro-infiltration. Data from three independent experiments is shown. Circles represent individual data points, and letters represent statistical significance determined by one-way ANOVA and Tukey's post-hoc test ( $P < 0.05$ ).

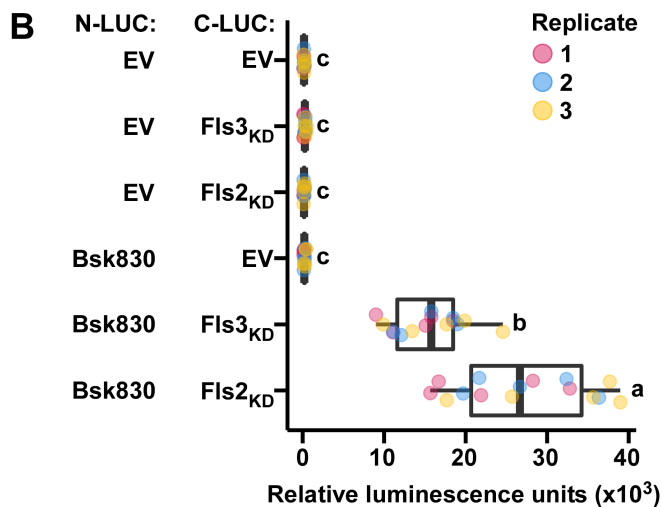

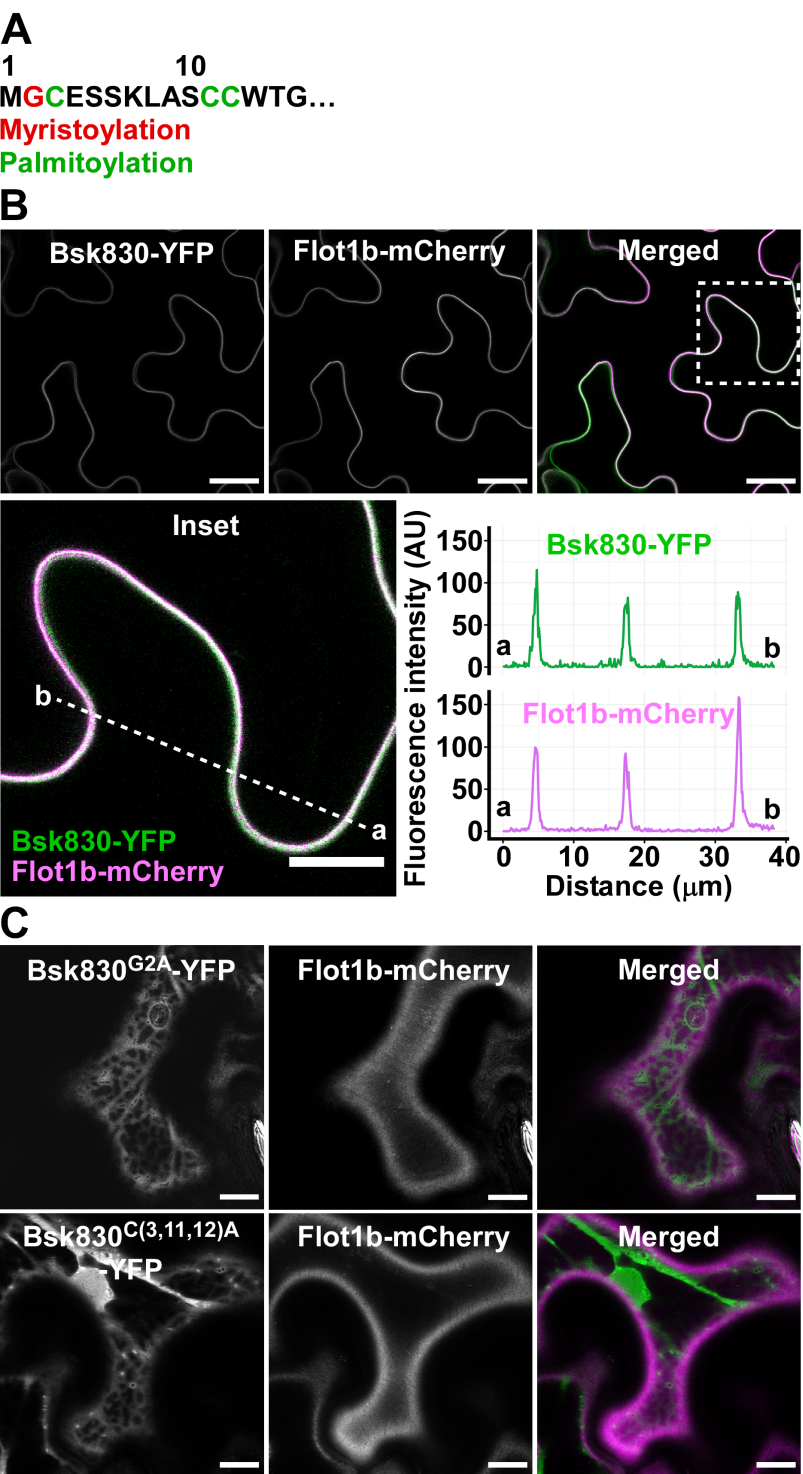

**Figure 2.** Bsk830 localizes to the plasma membrane. A, Putative myristoylation and palmitoylation sites at the N-terminus of Bsk830. Bsk830-YFP (B), Bsk830<sup>G2A</sup>-YFP (C), or Bsk830<sup>C(3,11,12)A</sup>-YFP (C) fusion proteins were co-expressed via *A. tumefaciens* GV2260 in *N. benthamiana* leaves with the plasma membrane marker Flot1b-mCherry. Fluorescence was monitored in epidermal cells by confocal microscopy at 48 h after agro-infiltration. YFP, mCherry, and merged fluorescence images are shown. The region marked in the merged image by a dotted square is magnified in the inset panel. Fluorescence intensity was measured in the YFP and mCherry channels along the dotted line. Scale bars represents 20  $\mu\text{m}$ , except for the inset image, where it represents 10  $\mu\text{m}$ .



## Sobol et al., Figure 3

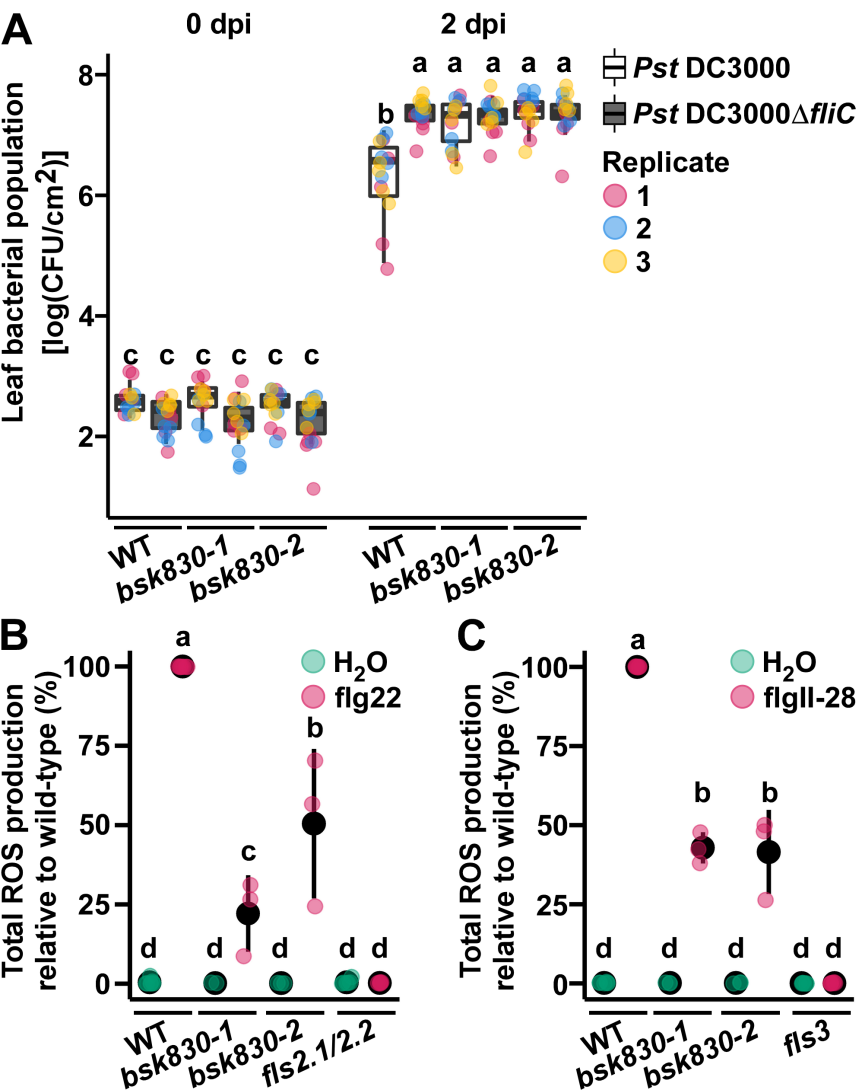

**Figure 3.** Bsk830 is required for flagellin-mediated immunity. A, Wild-type and *bsk830* mutant plants were inoculated by dipping into a bacterial suspension ( $10^7$  CFU mL<sup>-1</sup>) of *Pst* DC3000 or *Pst* DC3000Δ*fliC*. Bacterial populations were measured in leaves at 0 and 2 days post-inoculation (dpi). Circles represent individual data points of three biological replicates, and letters represent statistical significance determined by two-way ANOVA and Tukey's post-hoc test ( $P < 0.05$ ). B and C, ROS production. Leaf discs were treated with 100 nM of flg22, flgII-28, or water. Luminescence was measured for 30 min after flg22 treatment (B) and for 45 min after flgII-28 treatment (C). ROS production was normalized to the ROS amount produced by wild-type plants at its peak. Data are means  $\pm$  SD of three biological replicates.

## Sobol et al., Figure 4

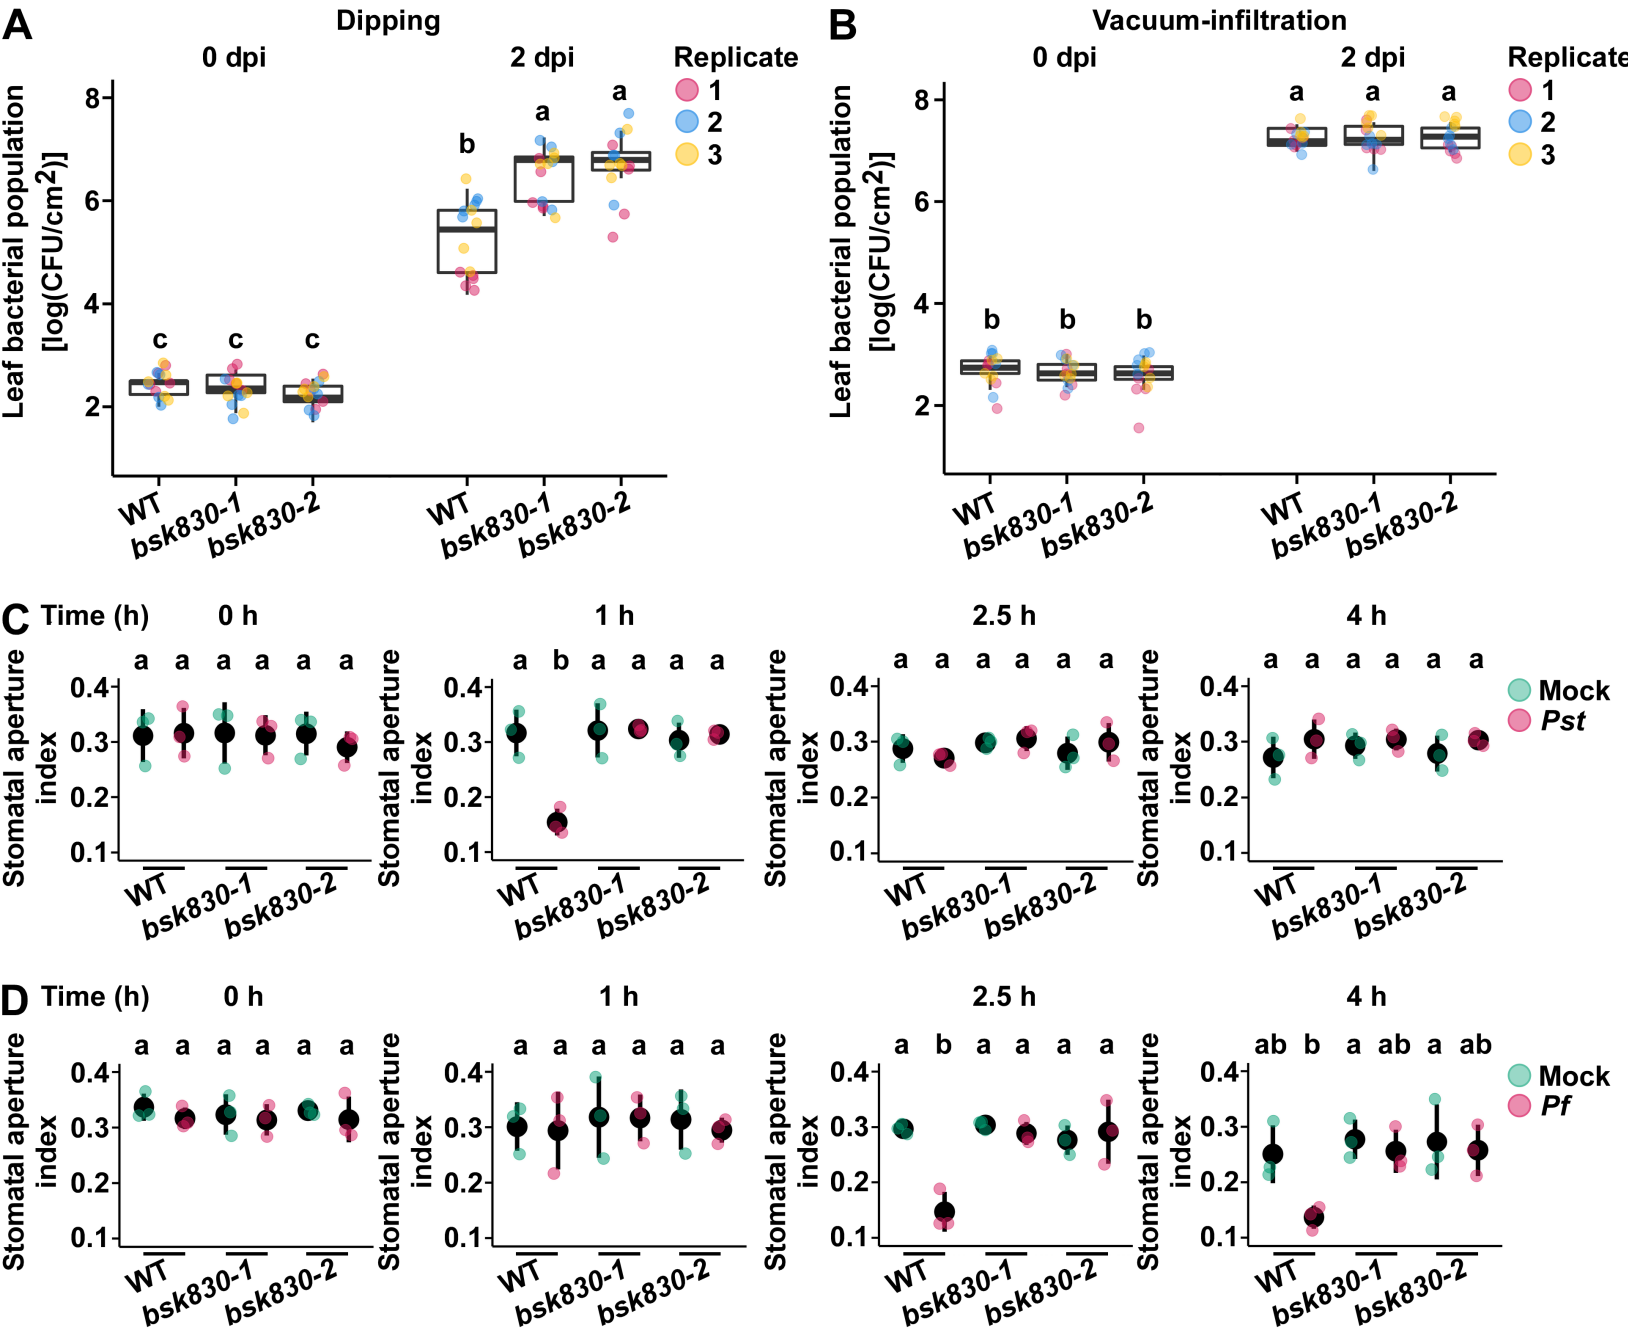

**Figure 4.** *bsk830* mutant plants are compromised in stomatal immunity. A and B, Wild-type and *bsk830* mutant plants were inoculated with *Pst* DC3000 by dipping ( $10^7$  CFU mL $^{-1}$ ) (A) or vacuum-infiltration ( $10^5$  CFU mL $^{-1}$ ) (B). Bacterial populations were measured in leaves at 0 and 2 days post-inoculation (dpi). Data from three independent experiments is shown. C and D, Stomatal aperture index (aperture width divided by the stomata length) was determined in leaves after 0, 1, 2.5, and 4 h floating on suspensions ( $10^8$  CFU mL $^{-1}$ ) of *Pst* DC3000 (C) and *Pf* A506 (D), or water (mock). Circles represent mean of three biological replicates. Letters represent statistical significance determined by one-way (A and B) or two-way (C and D) ANOVA and Tukey's post-hoc test ( $P < 0.05$ ).

## Sobol et al., Figure 5

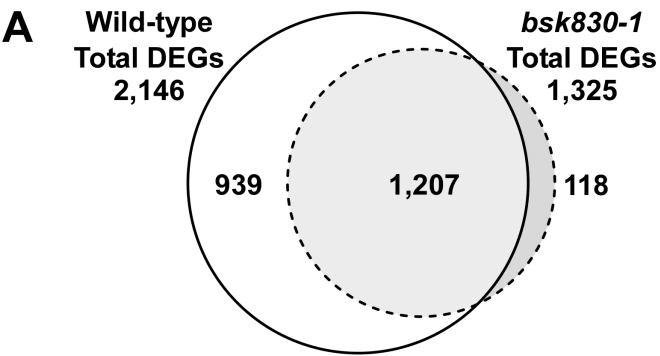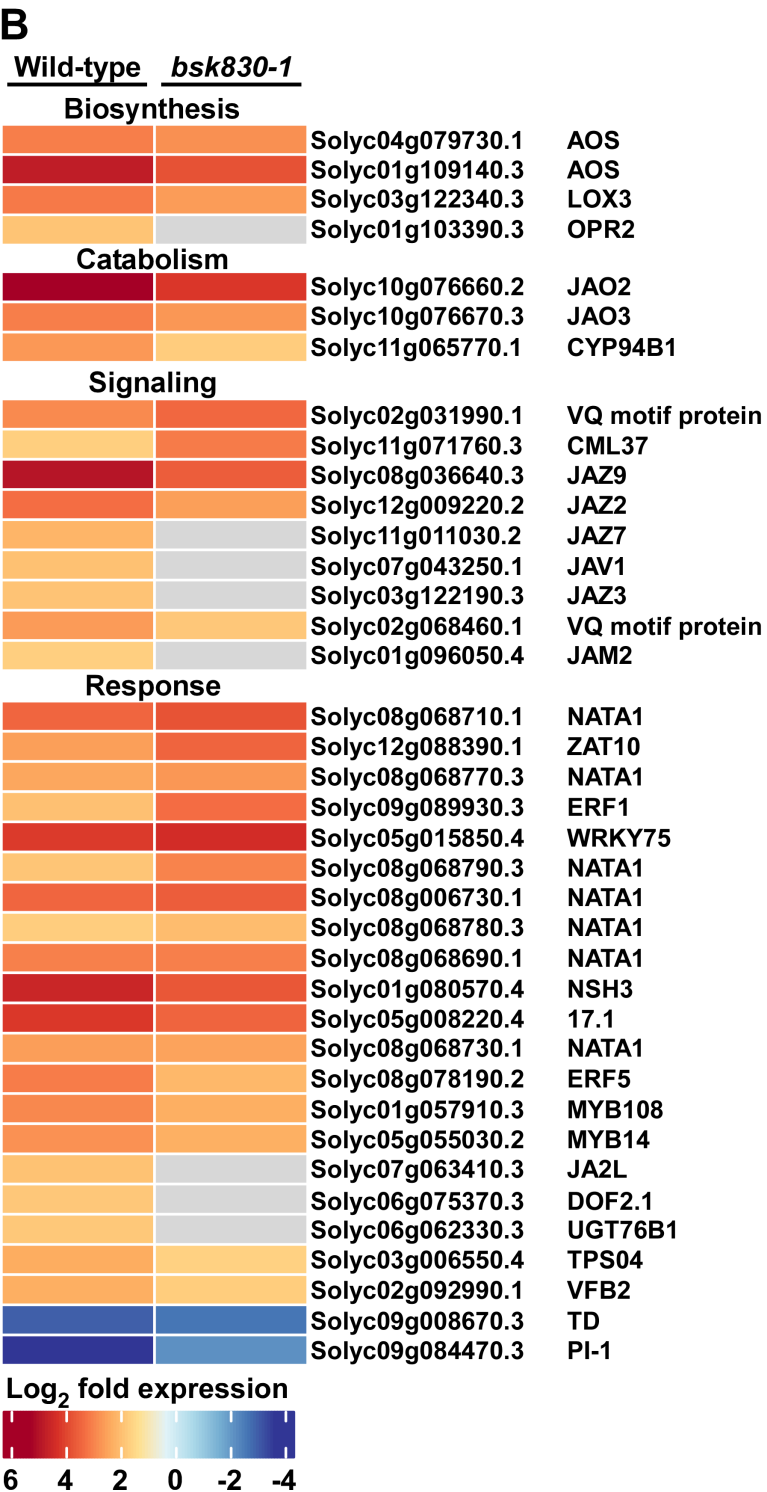

**Figure 5.** A, Euler diagram representing differentially expressed genes (DEGs) ( $p\text{FDR} < 0.05$ , fold change  $> 3$ , *Pf* vs. mock treatment comparison) in wild-type and *bsk830-1* plants. B, Loss of function in *Bsk830* alters expression of genes involved in JA biosynthesis, catabolism, signaling, and response. Each row represents a single gene accompanied by its Solanaceae Genomics Network accession number. Genes not characterized in tomato are annotated with name of the *Arabidopsis* gene with the highest protein similarity obtained by BLAST. The legend corresponds to relative  $\log_2$  fold change values calculated based on a *Pf* vs. mock treatment comparison performed for either wild-type or the *bsk830* mutant line. Grey rectangles represent genes with no fold change value available.

## Sobol et al., Figure 6

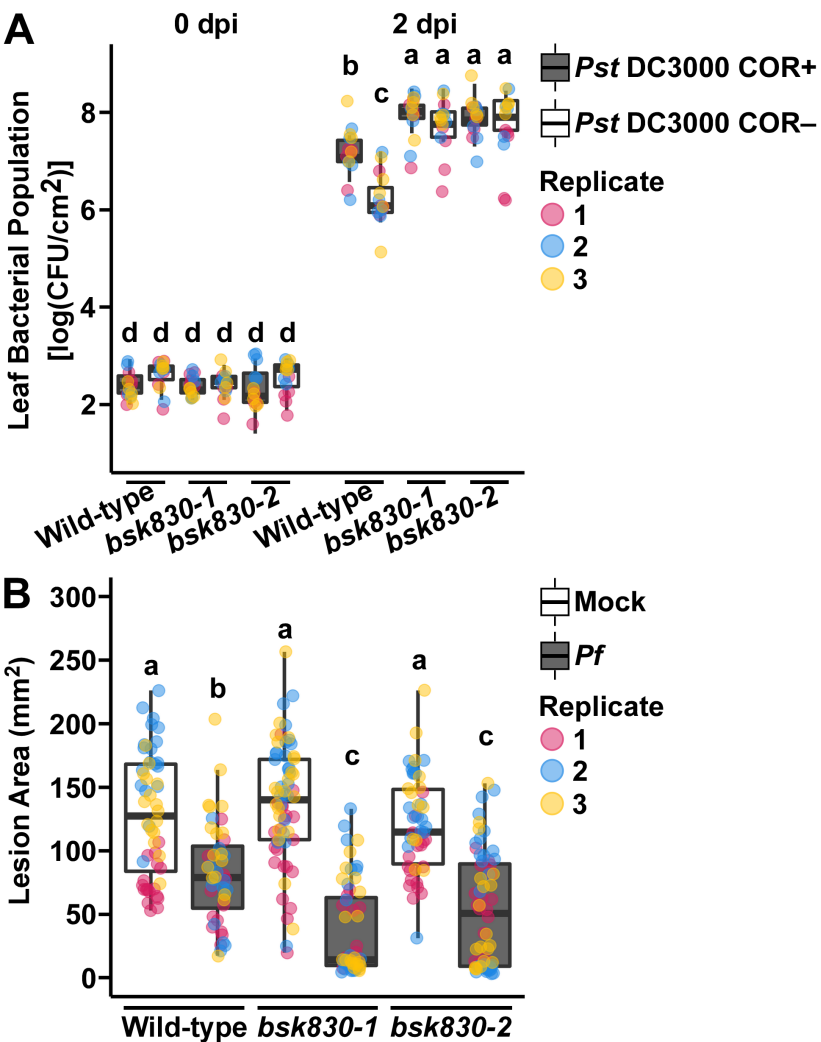

**Figure 6.** A, Plants of the indicated genotypes were inoculated by dipping with a  $10^7$  CFU mL<sup>-1</sup> bacterial suspension of *Pst* DC3000 (COR+) or *Pst* DC3118 (COR-). Bacterial populations in leaves were measured at 0 and 2 dpi. B, Plants of the indicated genotypes were vacuum-infiltrated with a *Pf* A506 suspension ( $10^8$  CFU mL<sup>-1</sup>). After 24 h, plants were inoculated by placing a droplet of a suspension carrying *Botrytis cinerea* spores ( $2 \times 10^5$  conidia mL<sup>-1</sup>). Lesion area was measured at 3 dpi. In (A and B) data from three independent experiments is shown. Letters represent statistical significance determined by two-way ANOVA and Tukey's post-hoc test ( $P < 0.05$ ).

## Parsed Citations

**Andolfo G, Sanseverino W, Rombauts S, Peer Y, Bradeen JM, Carpato D, Frusciante L, Ercolano MR (2013) Overview of tomato (*Solanum lycopersicum*) candidate pathogen recognition genes reveals important *Solanum* R locus dynamics. *New Phytol* 197: 223–237**

Google Scholar: [Author Only](#) [Title Only](#) [Author and Title](#)

**Arnaud D, Hwang I (2015) A sophisticated network of signaling pathways regulates stomatal defenses to bacterial pathogens. *Mol Plant* 8: 566–581**

Google Scholar: [Author Only](#) [Title Only](#) [Author and Title](#)

**Attaran E, Major IT, Cruz JA, Rosa BA, Koo AJK, Chen J, Kramer DM, He SY, Howe GA (2014) Temporal dynamics of growth and photosynthesis suppression in response to jasmonate signaling. *Plant Physiol* 165: 1302–1314**

Google Scholar: [Author Only](#) [Title Only](#) [Author and Title](#)

**Chen H, Zou Y, Shang Y, Lin H, Wang Y, Cai R, Tang X, Zhou J-M (2008) Firefly luciferase complementation imaging assay for protein-protein interactions in plants. *Plant Physiol* 146: 368–376**

Google Scholar: [Author Only](#) [Title Only](#) [Author and Title](#)

**Clarke CR, Chinchilla D, Hind SR, Taguchi F, Miki R, Ichinose Y, Martin GB, Leman S, Felix G, Vinatzer BA (2013) Allelic variation in two distinct *Pseudomonas syringae* flagellin epitopes modulates the strength of plant immune responses but not bacterial motility. *New Phytol* 200: 847–860**

Google Scholar: [Author Only](#) [Title Only](#) [Author and Title](#)

**Deblaere R, Bytebier B, De Greve H, Deboeck F, Schell J, Van Montagu M, Leemans J (1985) Efficient octopine Ti plasmid-derived vectors for *Agrobacterium*-mediated gene transfer to plants. *Nucleic Acids Res* 13: 4777–4788**

Google Scholar: [Author Only](#) [Title Only](#) [Author and Title](#)

**DeFalco TA, Zipfel C (2021) Molecular mechanisms of early plant pattern-triggered immune signaling. *Mol Cell* 81: 3449–3467**

Google Scholar: [Author Only](#) [Title Only](#) [Author and Title](#)

**Dobin A, Davis CA, Schlesinger F, Drenkow J, Zaleski C, Jha S, Batut P, Chaisson M, Gingeras TR (2013) STAR: ultrafast universal RNA-seq aligner. *Bioinformatics* 29: 15–21**

Google Scholar: [Author Only](#) [Title Only](#) [Author and Title](#)

**Du M, Zhai Q, Deng L, Li S, Li H, Yan L, Huang Z, Wang B, Jiang H, Huang T, et al (2014) Closely related NAC transcription factors of tomato differentially regulate stomatal closure and reopening during pathogen attack. *Plant Cell* 26: 3167–3184**

Google Scholar: [Author Only](#) [Title Only](#) [Author and Title](#)

**Du M, Zhao J, Tzeng DTW, Liu Y, Deng L, Yang T, Zhai Q, Wu F, Huang Z, Zhou M, et al (2017) MYC2 orchestrates a hierarchical transcriptional cascade that regulates jasmonate-mediated plant immunity in tomato. *Plant Cell* 29: 1883–1906**

Google Scholar: [Author Only](#) [Title Only](#) [Author and Title](#)

**Duxbury Z, Wu C, Ding P (2021) A comparative overview of the intracellular guardians of plants and animals: NLRs in innate immunity and beyond. *Annu Rev Plant Biol* 72: 155–184**

Google Scholar: [Author Only](#) [Title Only](#) [Author and Title](#)

**Frary A, Van Eck J (2005) Organogenesis from transformed tomato explants. *Transgenic plants: methods and protocols* pp. 141–150**

Google Scholar: [Author Only](#) [Title Only](#) [Author and Title](#)

**Frederick RD, Thilmony RL, Sessa G, Martin GB (1998) Recognition specificity for the bacterial avirulence protein AvrPto is determined by Thr-204 in the activation loop of the tomato Pto kinase. *Mol Cell* 2: 241–245**

Google Scholar: [Author Only](#) [Title Only](#) [Author and Title](#)

**Gimenez-Ibanez S, Boter M, Fernández-Barbero G, Chini A, Rathjen JP, Solano R (2014) The bacterial effector HopX1 targets JAZ transcriptional repressors to activate jasmonate signaling and promote infection in *Arabidopsis*. *PLoS Biol* 12: e1001792**

Google Scholar: [Author Only](#) [Title Only](#) [Author and Title](#)

**Gimenez-Ibanez S, Boter M, Ortigosa A, García-Casado G, Chini A, Lewsey MG, Ecker JR, Ntoukakis V, Solano R (2017) JAZ2 controls stomata dynamics during bacterial invasion. *New Phytol* 213: 1378–1392**

Google Scholar: [Author Only](#) [Title Only](#) [Author and Title](#)

**Gómez-Gómez L, Boller T (2000) FLS2: an LRR receptor-like kinase involved in the perception of the bacterial elicitor flagellin in *Arabidopsis*. *Mol Cell* 5: 1003–11**

Google Scholar: [Author Only](#) [Title Only](#) [Author and Title](#)

**Goodin MM, Zaitlin D, Naidu RA, Lommel SA (2008) *Nicotiana benthamiana*: its history and future as a model for plant-pathogen interactions. *Mol Plant Microbe Interact* 21: 1015–1026**

Google Scholar: [Author Only](#) [Title Only](#) [Author and Title](#)

Graves S, Piepho HP, Selzer L (2019) multcompView: Visualizations of paired comparisons. R package version 0.1-8. Available at: <https://cran.r-project.org/package=multcompView>.

Google Scholar: [Author Only](#) [Title Only](#) [Author and Title](#)

Guo H, Nolan TM, Song G, Liu S, Xie Z, Chen J, Schnable PS, Walley JW, Yin Y (2018) FERONIA receptor kinase contributes to plant immunity by suppressing jasmonic acid signaling in *Arabidopsis thaliana*. *Curr Biol* 28: 3316-3324.e6

Google Scholar: [Author Only](#) [Title Only](#) [Author and Title](#)

Guo M, Tian F, Wamboldt Y, Alfano JR (2009) The majority of the type III effector inventory of *Pseudomonas syringae* pv. tomato DC3000 can suppress plant immunity. *Mol Plant-Microbe Interact* 22: 1069-1080

Google Scholar: [Author Only](#) [Title Only](#) [Author and Title](#)

Guzel Deger A, Scherzer S, Nuhkat M, Kedzierska J, Kollist H, Brosché M, Unyayar S, Boudsocq M, Hedrich R, Roelfsema MRG (2015) Guard cell SLAC1-type anion channels mediate flagellin-induced stomatal closure. *New Phytol* 208: 162-173

Google Scholar: [Author Only](#) [Title Only](#) [Author and Title](#)

Guzman AR, Kim J-G, Taylor KW, Lanver D, Mudgett MB (2020) Tomato Atypical Receptor Kinase1 is involved in the regulation of preinvasion defense. *Plant Physiol* 183: 1306-1318

Google Scholar: [Author Only](#) [Title Only](#) [Author and Title](#)

Hind SR, Strickler SR, Boyle PC, Dunham DM, Bao Z, O'Doherty IM, Baccile JA, Hoki JS, Viox EG, Clarke CR, et al (2016a) Tomato receptor FLAGELLIN-SENSING 3 binds flgII-28 and activates the plant immune system. *Nat Plants* 2: 1-8

Google Scholar: [Author Only](#) [Title Only](#) [Author and Title](#)

Jacobs TB, LaFayette PR, Schmitz RJ, Parrott WA (2015) Targeted genome modifications in soybean with CRISPR/Cas9. *BMC Biotechnol* 15: 16

Google Scholar: [Author Only](#) [Title Only](#) [Author and Title](#)

Jacobs TB, Zhang N, Patel D, Martin GB (2017) Generation of a collection of mutant tomato lines using pooled CRISPR libraries. *Plant Physiol* 174: 2023-2037

Google Scholar: [Author Only](#) [Title Only](#) [Author and Title](#)

Jarad M, Mariappan K, Almeida-Trapp M, Mette MF, Mithöfer A, Rayapuram N, Hirt H (2020) The Lamin-Like LITTLE NUCLEI 1 (LINC1) regulates pattern-triggered immunity and jasmonic acid signaling. *Front Plant Sci*. 1639

Google Scholar: [Author Only](#) [Title Only](#) [Author and Title](#)

Jia Z, Giehl RFH, Meyer RC, Altmann T, von Wirén N (2019) Natural variation of BSK3 tunes brassinosteroid signaling to regulate root foraging under low nitrogen. *Nat Commun* 10: 2378

Google Scholar: [Author Only](#) [Title Only](#) [Author and Title](#)

Jiang S, Yao J, Ma K-W, Zhou H, Song J, He SY, Ma W (2013) Bacterial effector activates jasmonate signaling by directly targeting JAZ transcriptional repressors. *PLoS Pathog* 9: e1003715

Google Scholar: [Author Only](#) [Title Only](#) [Author and Title](#)

Kadota Y, Sklenar J, Derbyshire P, Stransfeld L, Asai S, Ntoukakis V, Jones JD, Shirasu K, Menke F, Jones A, et al (2014a) Direct regulation of the NADPH oxidase RBOHD by the PRR-associated kinase BIK1 during plant immunity. *Mol Cell* 54: 43-55

Google Scholar: [Author Only](#) [Title Only](#) [Author and Title](#)

Katsir L, Schillmiller AL, Staswick PE, He SY, Howe GA (2008) COI1 is a critical component of a receptor for jasmonate and the bacterial virulence factor coronatine. *Proc Natl Acad Sci* 105: 7100-7105

Google Scholar: [Author Only](#) [Title Only](#) [Author and Title](#)

Krol E, Mentzel T, Chinchilla D, Boller T, Felix G, Kemmerling B, Postel S, Arents M, Jeworutzki E, Al-Rasheid KAS, et al (2010) Perception of the *Arabidopsis* danger signal peptide 1 involves the pattern recognition receptor AtPEPR1 and its close homologue AtPEPR2. *J Biol Chem* 285: 13471-13479

Google Scholar: [Author Only](#) [Title Only](#) [Author and Title](#)

Kvitko BH, Park DH, Velásquez AC, Wei C-F, Russell AB, Martin GB, Schneider DJ, Collmer A (2009) Deletions in the repertoire of *Pseudomonas syringae* pv. tomato DC3000 type III secretion effector genes reveal functional overlap among effectors. *PLoS Pathog* 5: e1000388

Google Scholar: [Author Only](#) [Title Only](#) [Author and Title](#)

Larsson J (2020) eulerr: Area-proportional euler and venn diagrams with ellipses. R package version 6.1.0. Available at: <https://cran.r-project.org/package=eulerr>.

Google Scholar: [Author Only](#) [Title Only](#) [Author and Title](#)

Lee S, Ishiga Y, Clermont K, Mysore KS (2013) Coronatine inhibits stomatal closure and delays hypersensitive response cell death induced by nonhost bacterial pathogens. *PeerJ* 1: e34

Google Scholar: [Author Only](#) [Title Only](#) [Author and Title](#)

- Li L, Li M, Yu L, Zhou Z, Liang X, Liu Z, Cai G, Gao L, Zhang X, Wang Y, et al. (2014) The FLS2-associated kinase BIK1 directly phosphorylates the NADPH oxidase RbohD to control plant immunity. *Cell Host Microbe* 15: 329–338  
Google Scholar: [Author Only](#) [Title Only](#) [Author and Title](#)
- Li R, Liu P, Wan Y, Chen T, Wang Q, Mettbach U, Baluška F, Šamaj J, Fang X, Lucas WJ, et al. (2012a) A membrane microdomain-associated protein, Arabidopsis Flot1, is involved in a clathrin-independent endocytic pathway and is required for seedling development. *Plant Cell* 24: 2105–2122  
Google Scholar: [Author Only](#) [Title Only](#) [Author and Title](#)
- Li ZY, Xu ZS, He GY, Yang GX, Chen M, Li LC, Ma YZ (2012b) A mutation in Arabidopsis BSK5 encoding a brassinosteroid-signaling kinase protein affects responses to salinity and abscisic acid. *Biochem Biophys Res Commun* 426: 522–527  
Google Scholar: [Author Only](#) [Title Only](#) [Author and Title](#)
- Liang X, Zhou J-M (2018) Receptor-like cytoplasmic kinases: Central players in plant receptor kinase-mediated signaling. *Annu Rev Plant Biol* 69: 267–299  
Google Scholar: [Author Only](#) [Title Only](#) [Author and Title](#)
- Liu Y, Maierhofer T, Rybak K, Sklenar J, Breakspear A, Johnston MG, Fliegmann J, Huang S, Roelfsema MRG, Felix G, et al (2019) Anion channel SLAH3 is a regulatory target of chitin receptor-associated kinase PBL27 in microbial stomatal closure. *Elife*. 8: e44474  
Google Scholar: [Author Only](#) [Title Only](#) [Author and Title](#)
- Ma L, Salas O, Bowler K, Oren-Young L, Bar-Peled M, Sharon A (2017) Genetic alteration of UDP-rhamnose metabolism in *Botrytis cinerea* leads to the accumulation of UDP-KDG that adversely affects development and pathogenicity. *Mol Plant Pathol* 18: 263–275  
Google Scholar: [Author Only](#) [Title Only](#) [Author and Title](#)
- Ma SW, Morris, VL, Cuppels DA (1991) Characterization of a DNA region required for production of the phytotoxin coronatine by *Pseudomonas syringae* pv. tomato. *Mol Plant-Microbe Interact* 4: 69  
Google Scholar: [Author Only](#) [Title Only](#) [Author and Title](#)
- Majhi BB, Sobol G, Gachie S, Sreeramulu S, Sessa G (2021) BRASSINOSTEROID-SIGNALING KINASES 7 and 8 associate with the FLS2 immune receptor and are required for flg22-induced PTI responses. *Mol Plant Pathol* 22: 786–799  
Google Scholar: [Author Only](#) [Title Only](#) [Author and Title](#)
- Majhi BB, Sreeramulu S, Sessa G (2019) BRASSINOSTEROID-SIGNALING KINASE5 associates with immune receptors and is required for immune responses. *Plant Physiol* 180: 1166–1184  
Google Scholar: [Author Only](#) [Title Only](#) [Author and Title](#)
- Melotto M, Underwood W, Koczan J, Nomura K, He SY (2006) Plant stomata function in innate immunity against bacterial invasion. *Cell* 126: 969–980  
Google Scholar: [Author Only](#) [Title Only](#) [Author and Title](#)
- Melotto M, Zhang L, Oblessuc PR, He SY (2017) Stomatal defense a decade later. *Plant Physiol* 174: 561–571  
Google Scholar: [Author Only](#) [Title Only](#) [Author and Title](#)
- Mortazavi A, Williams BA, McCue K, Schaeffer L, Wold B (2008) Mapping and quantifying mammalian transcriptomes by RNA-Seq. *Nat Methods* 5: 621–628  
Google Scholar: [Author Only](#) [Title Only](#) [Author and Title](#)
- Murray MG, Thompson WF (1980) Rapid isolation of high molecular weight plant DNA. *Nucleic Acids Res* 8: 4321–4326  
Google Scholar: [Author Only](#) [Title Only](#) [Author and Title](#)
- Ooms G, Hooykaas PJJ, Van Veen RJM, Van Beelen P, Regensburg-Tuink TJG, Schilperoort RA (1982) Octopine Ti-plasmid deletion mutants of *Agrobacterium tumefaciens* with emphasis on the right side of the T-region. *Plasmid* 7: 15–29  
Google Scholar: [Author Only](#) [Title Only](#) [Author and Title](#)
- Popov G, Fraiture M, Brunner F, Sessa G (2016) Multiple *Xanthomonas euvesicatoria* type III effectors inhibit flg22-triggered immunity. *Mol Plant Microbe Interact* 29: 651–660  
Google Scholar: [Author Only](#) [Title Only](#) [Author and Title](#)
- Rao S, Zhou Z, Miao P, Bi G, Hu M, Wu Y, Feng F, Zhang X, Zhou J-M (2018) Roles of receptor-like cytoplasmic kinase VII members in pattern-triggered immune signaling. *Plant Physiol* 177: 1679–1690  
Google Scholar: [Author Only](#) [Title Only](#) [Author and Title](#)
- Raudvere U, Kolberg L, Kuzmin I, Arak T, Adler P, Peterson H, Vilo J (2019) g:Profiler: a web server for functional enrichment analysis and conversions of gene lists (2019 update). *Nucleic Acids Res* 47: W191–W198  
Google Scholar: [Author Only](#) [Title Only](#) [Author and Title](#)
- Ren H, Willige BC, Jaillais Y, Geng S, Park MY, Gray WM, Chory J (2019) BRASSINOSTEROID-SIGNALING KINASE 3, a plasma

**membrane-associated scaffold protein involved in early brassinosteroid signaling. PLOS Genet 15: e1007904**

Google Scholar: [Author Only](#) [Title Only](#) [Author and Title](#)

**Robatzek S, Bittel P, Chinchilla D, Köchner P, Felix G, Shiu S-H, Boller T (2007) Molecular identification and characterization of the tomato flagellin receptor LeFLS2, an orthologue of Arabidopsis FLS2 exhibiting characteristically different perception specificities. Plant Mol Biol 64: 539–47**

Google Scholar: [Author Only](#) [Title Only](#) [Author and Title](#)

**Roberts R, Hind SR, Pedley KF, Diner BA, Szarzanowicz MJ, Luciano-Rosario D, Majhi BB, Popov G, Sessa G, Oh C-S, et al. (2019a) Mai1 protein acts between host recognition of pathogen effectors and mitogen-activated protein kinase signaling. Mol Plant-Microbe Interact 32: 1496–1507**

Google Scholar: [Author Only](#) [Title Only](#) [Author and Title](#)

**Roberts R, Mainiero S, Powell AF, Liu AE, Shi K, Hind SR, Strickler SR, Collmer A, Martin GB (2019b) Natural variation for unusual host responses and flagellin-mediated immunity against *Pseudomonas syringae* in genetically diverse tomato accessions. New Phytol 223: 447–461**

Google Scholar: [Author Only](#) [Title Only](#) [Author and Title](#)

**Roberts R, Liu AE, Wan L, Geiger AM, Hind SR, Rosli HG, Martin GB (2020) Molecular characterization of differences between the tomato immune receptors Flagellin sensing 3 and Flagellin sensing 2. Plant Physiol 183: 1825–1837**

Google Scholar: [Author Only](#) [Title Only](#) [Author and Title](#)

**Rosli HG, Zheng Y, Pombo MA, Zhong S, Bombarely A, Fei Z, Collmer A, Martin GB (2013) Transcriptomics-based screen for genes induced by flagellin and repressed by pathogen effectors identifies a cell wall-associated kinase involved in plant immunity. Genome Biol 14: 1-15**

Google Scholar: [Author Only](#) [Title Only](#) [Author and Title](#)

**Salomon D, Sessa G (2010) Identification of growth inhibition phenotypes induced by expression of bacterial type III effectors in yeast. J Vis Exp. 37: e1865**

Google Scholar: [Author Only](#) [Title Only](#) [Author and Title](#)

**Sasaki-Sekimoto Y, Jikumaru Y, Obayashi T, Saito H, Masuda S, Kamiya Y, Ohta H, Shirasu K (2013) Basic helix-loop-helix transcription factors JASMONATE-ASSOCIATED MYC2-LIKE1 (JAM1), JAM2, and JAM3 are negative regulators of jasmonate responses in arabidopsis. Plant Physiol 163: 291–304**

Google Scholar: [Author Only](#) [Title Only](#) [Author and Title](#)

**Shi H, Li Q, Luo M, Yan H, Xie B, Li X, Zhong G, Chen D, Tang D (2022) BRASSINOSTEROID-SIGNALING KINASE1 modulates MAP KINASE15 phosphorylation to confer powdery mildew resistance in Arabidopsis. Plant Cell.**

Google Scholar: [Author Only](#) [Title Only](#) [Author and Title](#)

**Shi H, Shen Q, Qi Y, Yan H, Nie H, Chen Y, Zhao T, Katagiri F, Tang D (2013) BR-SIGNALING KINASE1 physically associates with FLAGELLIN SENSING2 and regulates plant innate immunity in Arabidopsis. Plant Cell 25: 1143–1157**

Google Scholar: [Author Only](#) [Title Only](#) [Author and Title](#)

**Sierla M, Waszczak C, Vahisalu T, Kangasjärvi J (2016) Reactive oxygen species in the regulation of stomatal movements. Plant Physiol 171: 1569–1580**

Google Scholar: [Author Only](#) [Title Only](#) [Author and Title](#)

**Singh DK, Calviño M, Brauer EK, Fernandez-Pozo N, Strickler S, Yalamanchili R, Suzuki H, Aoki K, Shibata D, Stratmann JW, et al. (2014) The tomato kinome and the tomato kinase library ORFeome: Novel resources for the study of kinases and signal transduction in tomato and Solanaceae species. Mol Plant-Microbe Interact 27: 7–17**

Google Scholar: [Author Only](#) [Title Only](#) [Author and Title](#)

**Smirnova E, Marquis V, Poirier L, Aubert Y, Zumsteg J, Ménard R, Miesch L, Heitz T (2017) Jasmonic Acid Oxidase 2 hydroxylates jasmonic acid and represses basal defense and resistance responses against *Botrytis cinerea* infection. Mol Plant 10: 1159–1173**

Google Scholar: [Author Only](#) [Title Only](#) [Author and Title](#)

**Sreeramulu S, Mostizky Y, Sunitha S, Shani E, Nahum H, Salomon D, Hayun L Ben, Gruetter C, Rauh D, Ori N, et al. (2013) BSKs are partially redundant positive regulators of brassinosteroid signaling in Arabidopsis. Plant J 74: 905–919**

Google Scholar: [Author Only](#) [Title Only](#) [Author and Title](#)

**Su B, Wang A, Shan X (2022) The role of N-myristoylation in homeostasis of brassinosteroid signaling kinase 1. Planta 255: 73**

Google Scholar: [Author Only](#) [Title Only](#) [Author and Title](#)

**Su B, Zhang X, Li L, Abbas S, Yu M, Cui Y, Baluška F, Hwang I, Shan X, Lin J (2021) Dynamic spatial reorganization of BSK1 complexes in the plasma membrane underpins signal-specific activation for growth and immunity. Mol Plant 14: 588–603**

Google Scholar: [Author Only](#) [Title Only](#) [Author and Title](#)

**Tang W, Kim T-W, Osés-Prieto JA, Sun Y, Deng Z, Zhu S, Wang R, Burlingame AL, Wang Z-Y (2008) BSKs mediate signal transduction from the receptor kinase BRI1 in Arabidopsis. Science 321: 557–60**



Google Scholar: [Author Only](#) [Title Only](#) [Author and Title](#)

**Thaler JS, Humphrey PT, Whiteman NK (2012) Evolution of jasmonate and salicylate signal crosstalk. Trends Plant Sci 17: 260–270**

Google Scholar: [Author Only](#) [Title Only](#) [Author and Title](#)

**Thor K, Jiang S, Michard E, George J, Scherzer S, Huang S, Dindas J, Derbyshire P, Leitão N, DeFalco TA, et al (2020) The calcium-permeable channel OSCA1.3 regulates plant stomatal immunity. Nature 585: 569–573**

Google Scholar: [Author Only](#) [Title Only](#) [Author and Title](#)

**Tian W, Hou C, Ren Z, Wang C, Zhao F, Dahlbeck D, Hu S, Zhang L, Niu Q, Li L, et al (2019) A calmodulin-gated calcium channel links pathogen patterns to plant immunity. Nature 572: 131–135**

Google Scholar: [Author Only](#) [Title Only](#) [Author and Title](#)

**Tomato Genome Consortium (2012) The tomato genome sequence provides insights into fleshy fruit evolution. Nature 485: 635–641**

Google Scholar: [Author Only](#) [Title Only](#) [Author and Title](#)

**Toum L, Torres PS, Gallego SM, Benavides MP, Vojnov AA, Gudesblat GE (2016) Coronatine inhibits stomatal closure through guard cell-specific inhibition of NADPH oxidase-dependent ROS production. Front Plant Sci. 1851**

Google Scholar: [Author Only](#) [Title Only](#) [Author and Title](#)

**Vanholme R, De Meester B, Ralph J, Boerjan W (2019) Lignin biosynthesis and its integration into metabolism. Curr Opin Biotechnol 56: 230-239.**

Google Scholar: [Author Only](#) [Title Only](#) [Author and Title](#)

**Wang H, Hutton SF, Robbins MD, Sim S-C, Scott JW, Yang W, Jones JB, Francis DM (2011) Molecular mapping of hypersensitive resistance from tomato 'Hawaii 7981' to *Xanthomonas perforans* race T3. Phytopathology 101: 1217–1223**

Google Scholar: [Author Only](#) [Title Only](#) [Author and Title](#)

**Wang L, Albert M, Einig E, Fürst U, Krust D, Felix G (2016) The pattern-recognition receptor CORE of Solanaceae detects bacterial cold-shock protein. Nat Plants 2: 16185**

Google Scholar: [Author Only](#) [Title Only](#) [Author and Title](#)

**Wang Z, Gou X (2021) The first line of defense: Receptor-like protein kinase-mediated stomatal immunity. Int J Mol Sci 23: 343**

Google Scholar: [Author Only](#) [Title Only](#) [Author and Title](#)

**Wasternack C, Song S (2016) Jasmonates: biosynthesis, metabolism, and signaling by proteins activating and repressing transcription. J Exp Bot 68: 1303-1321**

Google Scholar: [Author Only](#) [Title Only](#) [Author and Title](#)

**Weyers JDB, Johansen LG (1985) Accurate estimation of stomatal aperture from silicone rubber impressions. New Phytol 101: 109–115**

Google Scholar: [Author Only](#) [Title Only](#) [Author and Title](#)

**Wilson M, Campbell HL, Ji P, Jones JB, Cuppels DA (2002) Biological control of bacterial speck of tomato under field conditions at several locations in north america. Phytopathology 92: 1284–1292**

Google Scholar: [Author Only](#) [Title Only](#) [Author and Title](#)

**Xing Y (2006) An expectation-maximization algorithm for probabilistic reconstructions of full-length isoforms from splice graphs. Nucleic Acids Res 34: 3150–3160**

Google Scholar: [Author Only](#) [Title Only](#) [Author and Title](#)

**Xu P, Xu S-L, Li Z-J, Tang W, Burlingame AL, Wang Z-Y (2014) A brassinosteroid-signaling kinase interacts with multiple receptor-like kinases in *Arabidopsis*. Mol Plant 7: 441–444**

Google Scholar: [Author Only](#) [Title Only](#) [Author and Title](#)

**Yan H, Zhao Y, Shi H, Li J, Wang Y, Tang D (2018) BRASSINOSTEROID-SIGNALING KINASE1 phosphorylates MAPKKK5 to regulate immunity in *Arabidopsis*. Plant Physiol 176: 2991-3002**

Google Scholar: [Author Only](#) [Title Only](#) [Author and Title](#)

**Yi SY, Shirasu K, Moon JS, Lee S-G, Kwon S-Y (2014) The activated SA and JA signaling pathways have an influence on flg22-triggered oxidative burst and callose deposition. PLoS One 9: e88951**

Google Scholar: [Author Only](#) [Title Only](#) [Author and Title](#)

**Zhang L, Zhang F, Melotto M, Yao J, He SY (2017) Jasmonate signaling and manipulation by pathogens and insects. J Exp Bot 68: 1371-1385**

Google Scholar: [Author Only](#) [Title Only](#) [Author and Title](#)

**Zhang N, Pombo MA, Rosli HG, Martin GB (2020) Tomato wall-associated kinase SiWak1 depends on Fls2/Fls3 to promote apoplastic immune responses to *Pseudomonas syringae*. Plant Physiol 183: 1869–1882**

Google Scholar: [Author Only](#) [Title Only](#) [Author and Title](#)

**Zheng X, Kang S, Jing Y, Ren Z, Li L, Zhou J-M, Berkowitz G, Shi J, Fu A, Lan W, et al (2018) Danger-associated peptides close stomata by OST1-independent activation of anion channels in guard cells. *Plant Cell* 30: 1132–1146**

Google Scholar: [Author Only](#) [Title Only](#) [Author and Title](#)

**Zheng X, Spivey NW, Zeng W, Liu P-P, Fu ZQ, Klessig DF, He SY, Dong X (2012) Coronatine promotes *Pseudomonas syringae* virulence in plants by activating a signaling cascade that inhibits salicylic acid accumulation. *Cell Host Microbe* 11: 587–596**

Google Scholar: [Author Only](#) [Title Only](#) [Author and Title](#)

**Zipfel C, Robatzek S, Navarro L, Oakeley EJ, Jones JDG, Felix G, Boller T (2004) Bacterial disease resistance in *Arabidopsis* through flagellin perception. *Nature* 428: 764–767**

Google Scholar: [Author Only](#) [Title Only](#) [Author and Title](#)
